# Supplementary material for: Multi-ion ionic liquids and a direct, reproducible, diversity-oriented way to make them
Source: Royal Society of Chemistry journal article supplement (doi:10.1039/c5cc05843k), 2015-01-01
Supplement: c5cc05843k1.pdf [file c5cc05843k1.pdf]

## Multi-ion ionic liquids and a direct, reproducible, diversity-oriented way to make them

Alexandra C. Stenson, Kevin N. West, W. Matthew Reichert, Phiwat Klomkaew, Cody G. Cassity,  
Breanna M. Dobyms, Benjamin Siu, and James H. Davis, Jr.

---

### SUPPORTING INFORMATION

| <u>Page(s)</u> | <u>Item(s)</u>                                                                                                                                                                                                      |
|----------------|---------------------------------------------------------------------------------------------------------------------------------------------------------------------------------------------------------------------|
| 2-4            | Representative Synthesis (IL <b>1a</b> )                                                                                                                                                                            |
| 5-8            | <sup>1</sup> H- and <sup>13</sup> C-NMRs of <b>1a</b> (batch 1)                                                                                                                                                     |
| 9              | ESI-MS and Elemental analysis of <b>1a</b> (batch 1)                                                                                                                                                                |
| 10-13          | <sup>1</sup> H- and <sup>13</sup> C-NMRs of <b>1a</b> (batch 2)                                                                                                                                                     |
| 13             | ESI-MS of <b>1a</b> (batch 2)                                                                                                                                                                                       |
| 14             | Elemental analysis of <b>1a</b> (batch 2)                                                                                                                                                                           |
| 14-16          | <sup>1</sup> H- and <sup>13</sup> C-NMRs of <b>1a</b> (batch 3)                                                                                                                                                     |
| 17-18          | ESI-MS and Elemental analysis of <b>1a</b> (batch 3)                                                                                                                                                                |
| 19-21          | <sup>1</sup> H- and <sup>13</sup> C-NMRs of <b>1b</b>                                                                                                                                                               |
| 22             | ESI-MS of <b>1b</b>                                                                                                                                                                                                 |
| 23             | Elemental analysis of <b>1b</b>                                                                                                                                                                                     |
| 23-26          | <sup>1</sup> H- and <sup>13</sup> C-NMRs of <b>1c</b>                                                                                                                                                               |
| 27             | ESI-MS and Elemental analysis of <b>1c</b>                                                                                                                                                                          |
| 28-30          | <sup>1</sup> H- and <sup>13</sup> C-NMRs of <b>2</b>                                                                                                                                                                |
| 31             | ESI-MS and Elemental analysis of <b>2</b>                                                                                                                                                                           |
| 32-34          | <sup>1</sup> H- and <sup>13</sup> C-NMRs of <b>3</b> (initial batch)                                                                                                                                                |
| 34-37          | <sup>1</sup> H- and <sup>13</sup> C-NMRs of <b>3</b> (2 <sup>nd</sup> batch) <b>NOTE: The hand written labels on some of these pages indicate them to belong to IL 1a batch 2. Those annotations are incorrect.</b> |
| 38-40          | <sup>1</sup> H- and <sup>13</sup> C-NMRs of <b>3</b> (3 <sup>rd</sup> batch) <b>NOTE: The hand written labels on some of these pages indicate them to belong to IL 1a batch 3. Those annotations are incorrect.</b> |
| 40             | ESI-MS of <b>3</b> (all three batches)                                                                                                                                                                              |
| 41-42          | Elemental analyses of <b>3</b> (all three batches)                                                                                                                                                                  |
| 42-43          | DSC data and acquisition parameters, <b>1a</b> , <b>2</b> , and <b>3</b>                                                                                                                                            |
| 43-44          | Water content (Karl Fisher) data for <b>1a</b> , <b>1b</b> , <b>1c</b> , <b>2</b> , and <b>3</b>                                                                                                                    |

### Synthesis of Multi-ion IL system **1a**

A stock solution of a 1:1 (mol/mol) mixture of allyl bromide (Aldrich, 99%, Reagent Plus<sup>®</sup>) and n-bromopropane (Aldrich, 99%) was prepared by combining 30.64g (0.2534 mol) of the former with 31.15g (0.2534 mol) of the latter. This gives a two-component alkylating reagent which has an average molecular weight of 121.99g/mol [ $\{\text{allyl bromide FW (120.98) + n-bromopropane FW (122.99)}\}/2$ ].

A 250 mL single-neck, round-bottomed flask was charged with a magnetic stir bar. Imidazole (7.71g, 0.1133 mol, Aldrich, 99%, Reagent Plus<sup>®</sup>) was then added, along with 12.02g (0.1133 mol) anhydrous Na<sub>2</sub>CO<sub>3</sub> (Fisher Scientific, Lab Grade, >95%). To the mixed solids was then added 125 mL acetonitrile (Fisher Scientific, ACS Reagent Grade) and 27.65g (0.2266 moles) of the two-component alkylating reagent previously prepared (*vide supra*). The mixture was then fitted with a water-cooled condenser (capped with a CaCl<sub>2</sub>-charged drying tube) and a heating mantle. The entire assembly was then secured to a magnetic stirrer which was then set to stir at 510 rpm. The mixture was heated to and maintained at 45° C. After 12 h a small sample of the solution was withdrawn, the acetonitrile evaporated, and the <sup>1</sup>H-NMR checked. It revealed conversion to be incomplete. Consequently, heating was continued for another 24 h (36 h total heating), at which time an NMR of the reaction mixture indicated that the reaction had reached completion. During the reaction period the suspended solid present (begins as Na<sub>2</sub>CO<sub>3</sub>) changed in appearance into a much finer-looking powder which accumulated at the flask sides (assumed to be NaBr and NaHCO<sub>3</sub>). After cooling, the acetonitrile was removed *in vacuo*, leaving a pasty residue. A brisk stream of clean, compressed air was blown into this mass for 24 h to remove any residual molecular materials. The mixture was then taken up into 100 mL of hot, de-ionized water and stirring commenced. To this was added 40.0 g (0.125 mol) of solid KTF<sub>2</sub>N [prepared in our laboratory by the neutralization of 80% aqueous HTf<sub>2</sub>N (Iolitec USA) with KOH]. As the KTF<sub>2</sub>N dissolved a copious quantity of a dense, pale-ivory liquid separated from the aqueous solution. After stirring overnight, the dense IL layer was separated, diluted with 200 mL of CH<sub>2</sub>Cl<sub>2</sub>, and the solution dried with anhydrous Na<sub>2</sub>SO<sub>4</sub>. Filtration of this suspension, followed by evaporation of the CH<sub>2</sub>Cl<sub>2</sub>, gave the final IL **1a**.

#### ADDITIONAL NOTES:

We have made **1a** and a number of other mixed-ion systems as of this writing. On occasion, when the alkylating agent mix employs an alkyl iodide, the final product has a medium to dark yellow color. This discoloration can often be diminished by dissolving the IL in methanol (specifically), heating to a boil, adding decolorizing carbon, and stirring overnight. Removal of the charcoal by filtration followed by removal of the methanol *in vacuo* gives a product with less color.

In repeated preparations of **1a** and other multi-imidazolium ion systems, we have generally found it advantageous to utilize 2.05-2.10 equivalents of the alkylating reagent relative to imidazole being employed. Even when the alkylating reagent component materials have relatively high boiling points, the excess is readily removed by the compressed-air treatment described.

For the repeat preparations of **1a**, two different batches of alkylating agent were prepared, one using reagents from TCI, and the other using TCI and Aldrich reagents together. Our aim was to introduce into the preparation opportunities for variation between the batches in order to gauge how sensitive to such variables our approach is with regard to being able to reproducibly generate a multi-ion system of consistent composition.

At the end of the reflux period, the precipitated NaBr and NaHCO<sub>3</sub> can be removed by filtration prior to removal of the acetonitrile *in vacuo*. However, we have not observed any improvement in the overall product quality or yield as a result of doing so.

Alkyl chlorides have been used successfully in conjunction with the present synthetic rubric. However, reactions in which they are used should be periodically assessed by NMR to gauge the extent of reaction. We have observed that reactions in which chlorides are employed can take up to 48 h to reach completion.

Procedures similar to the one used here have been reported before as a means to prepare N,N-dialkyl imidazolium salts for IL and imidazolidene-carbene applications (see references below). However, we have expressly found several of these have procedural elements that do not work well in our hands. Two of these of particular note are:

\*The use of bicarbonate salts (rather than carbonate salts) as the base; in our hands, multi-ion ILs prepared in this way routinely did not reach completion, and were intractably contaminated with various partly-alkylated imidazole/imidazolium species.

\*The use of secondary alkyl halides as alkylating agents. In our hands, elimination (dehydrohalogenation) was a serious competing reaction to alkylation, and routinely led to overall incomplete alkylation and impure multi-ion mixtures.

---

W. M. McDanel, M. G. Cowan, T. K. Carlisle, A. K. Swanson, R. D. Noble, D. L. Gin, *Polymer*, **2014**, *55*, 3305.

E. F. Hahn, B. Heidrich, A. Hepp, T. Pape, *J. Organomet. Chem.*, **2007**, *692*, 4630.

G.-H. Min, T. Yim, H. Y. Lee, D. H. Huh, E. Lee, J. Mun, S. M. Oh, Y. G. Kim, Young, *Bull. Korean Chem. Soc.*, **2006**, *27*, 847.

N. Kumar, R. Jain, *J. Heterocyc. Chem.*, **2012**, *49*, 370.

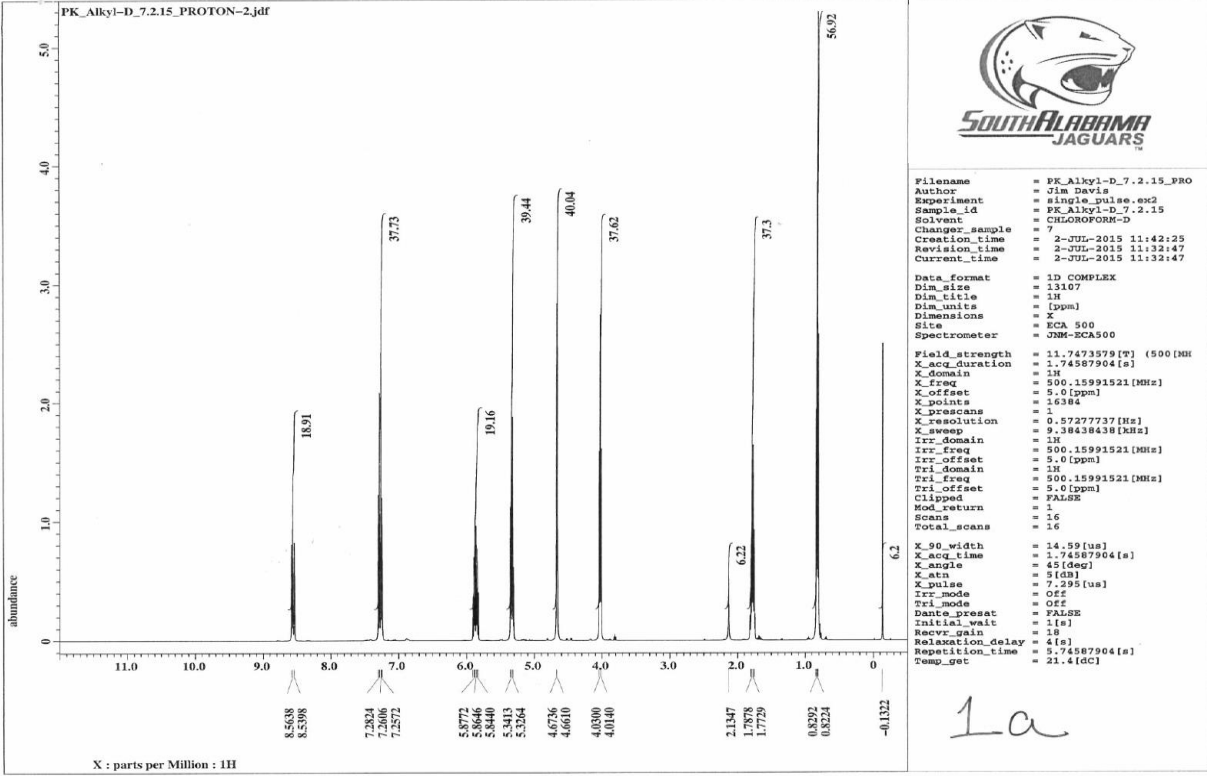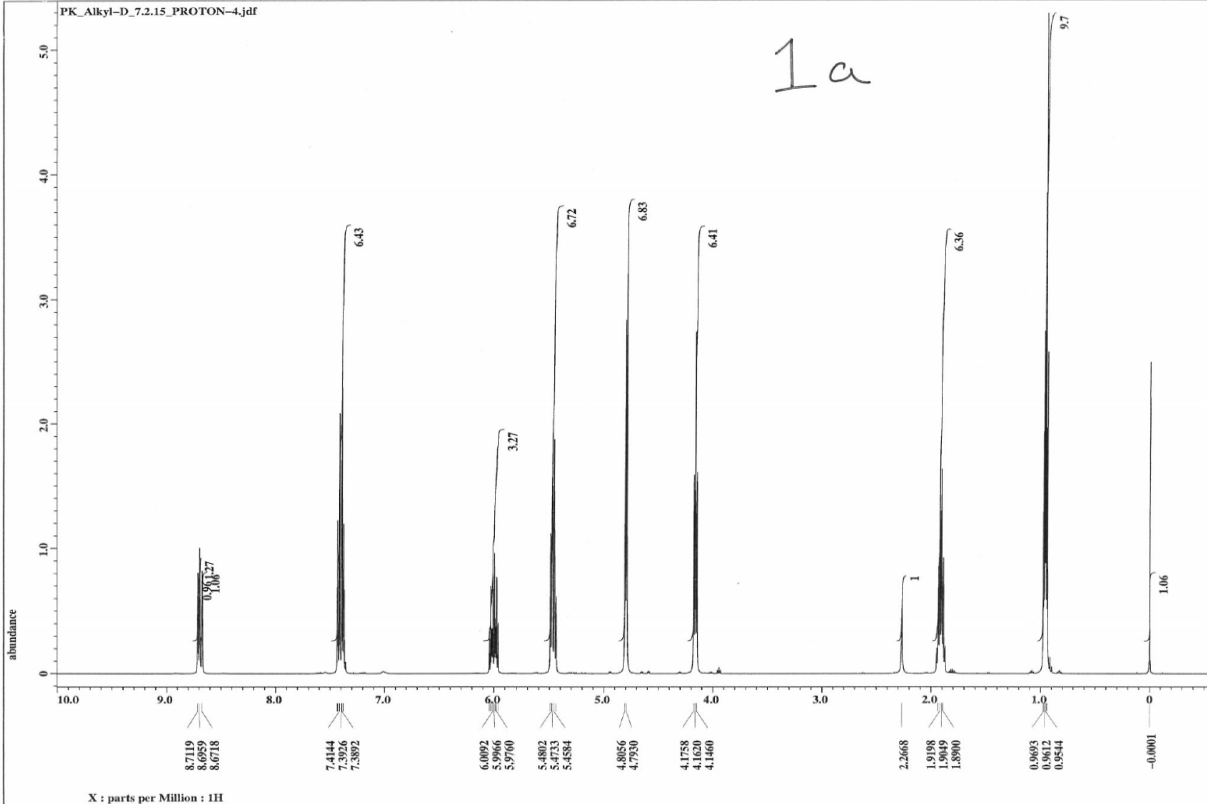

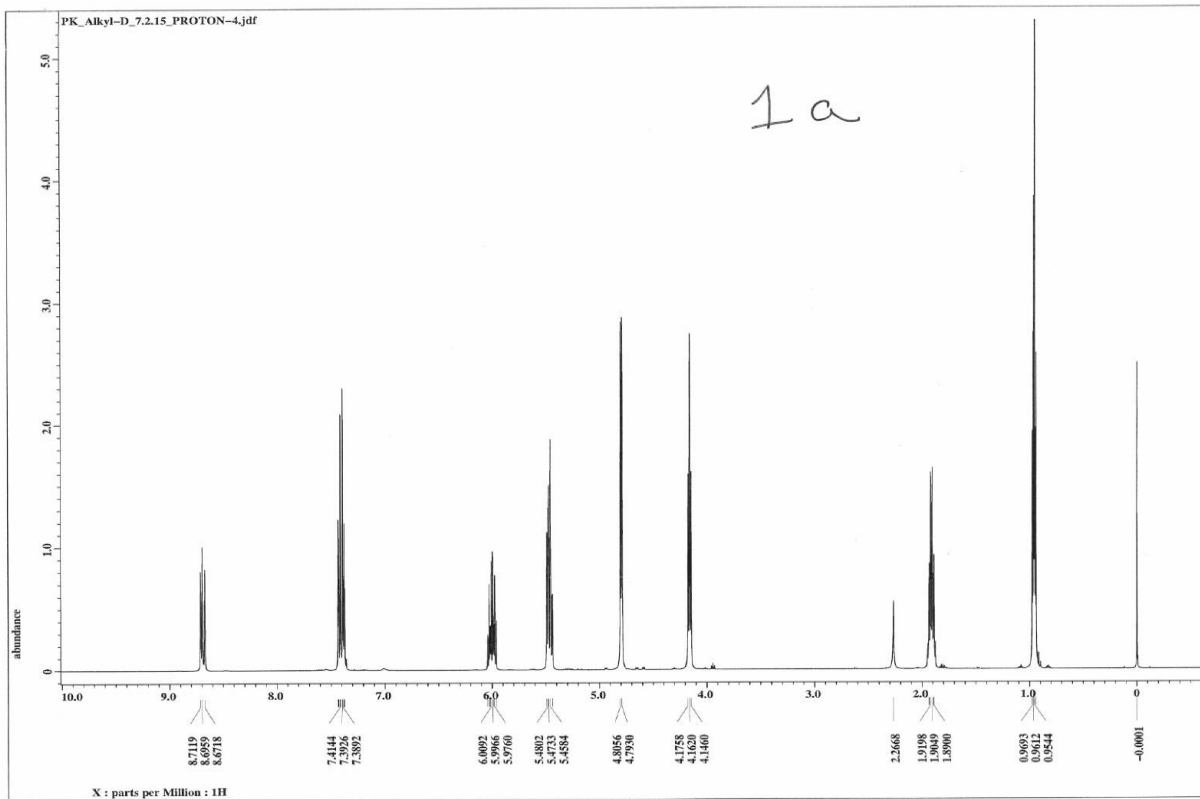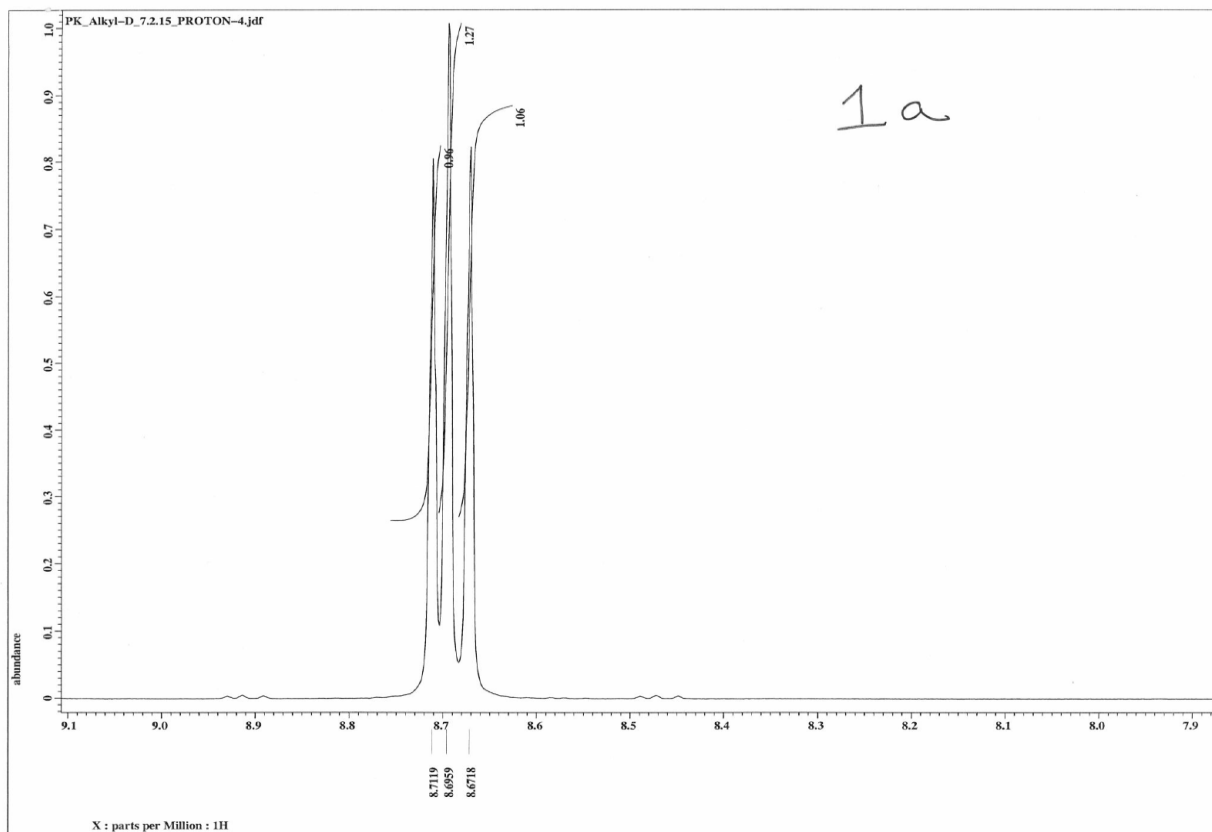

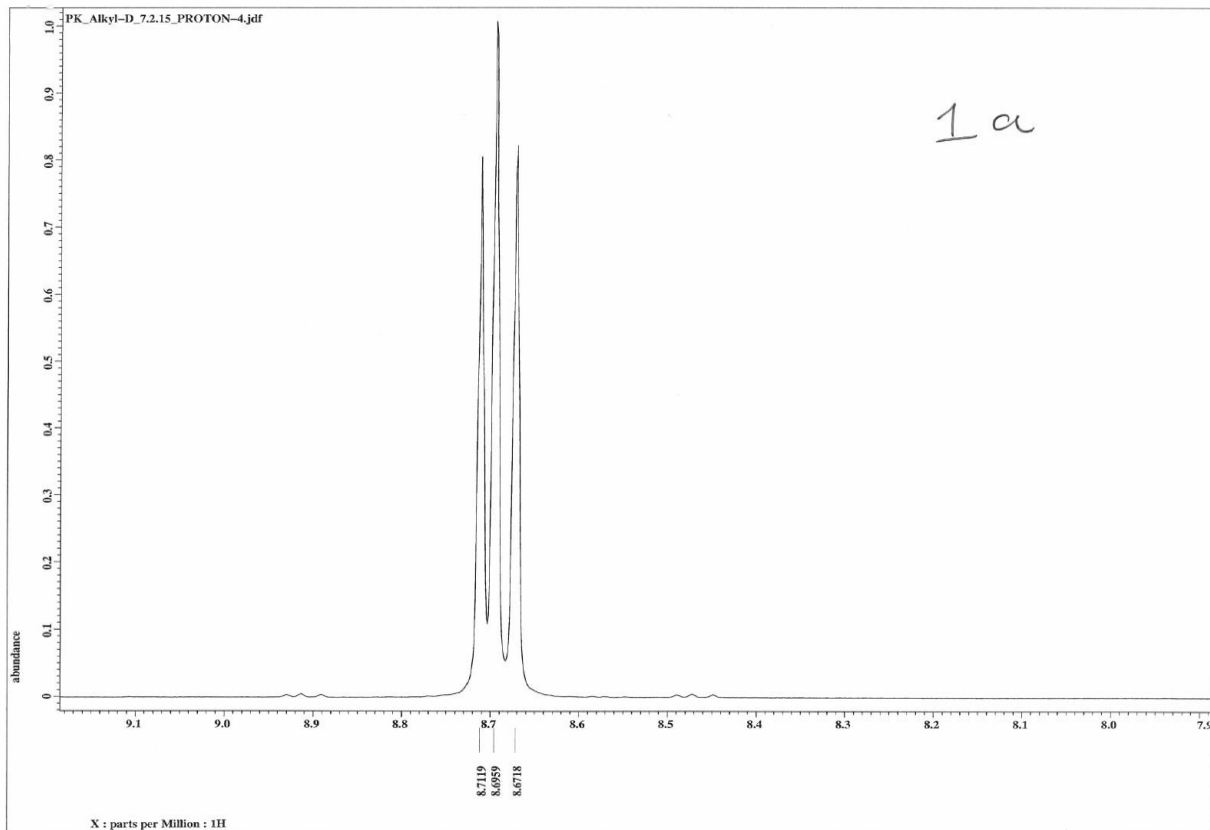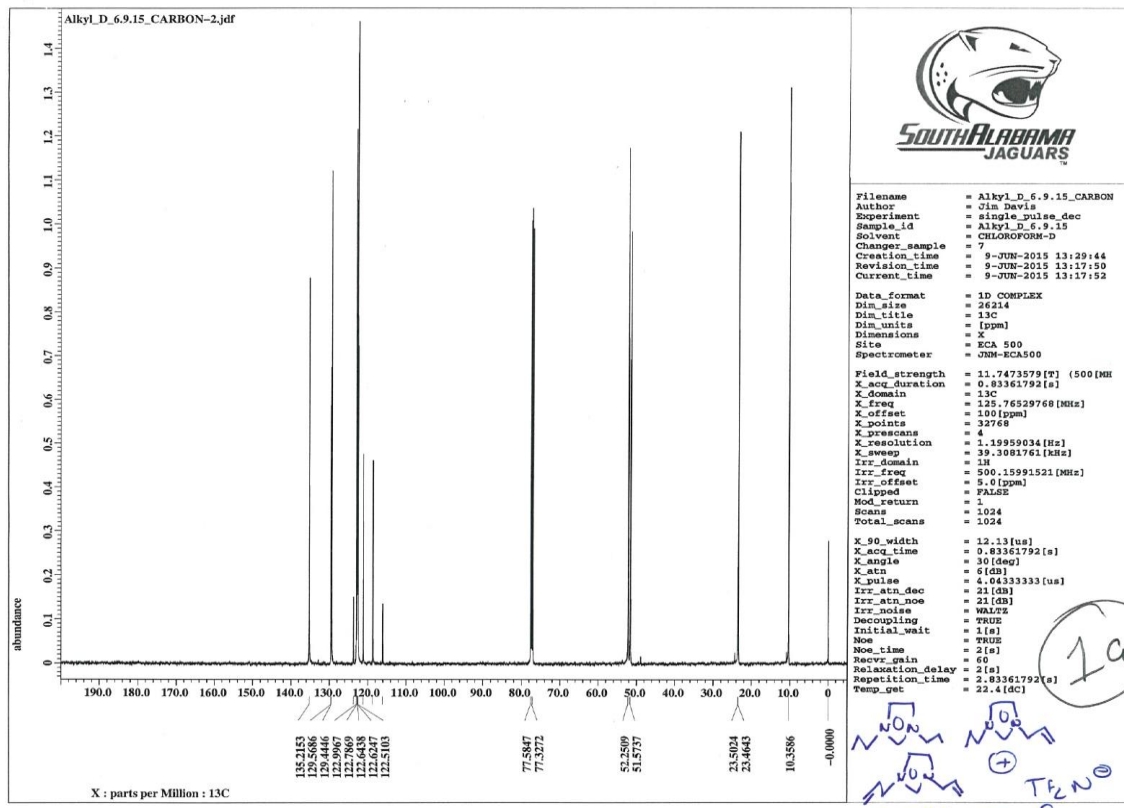

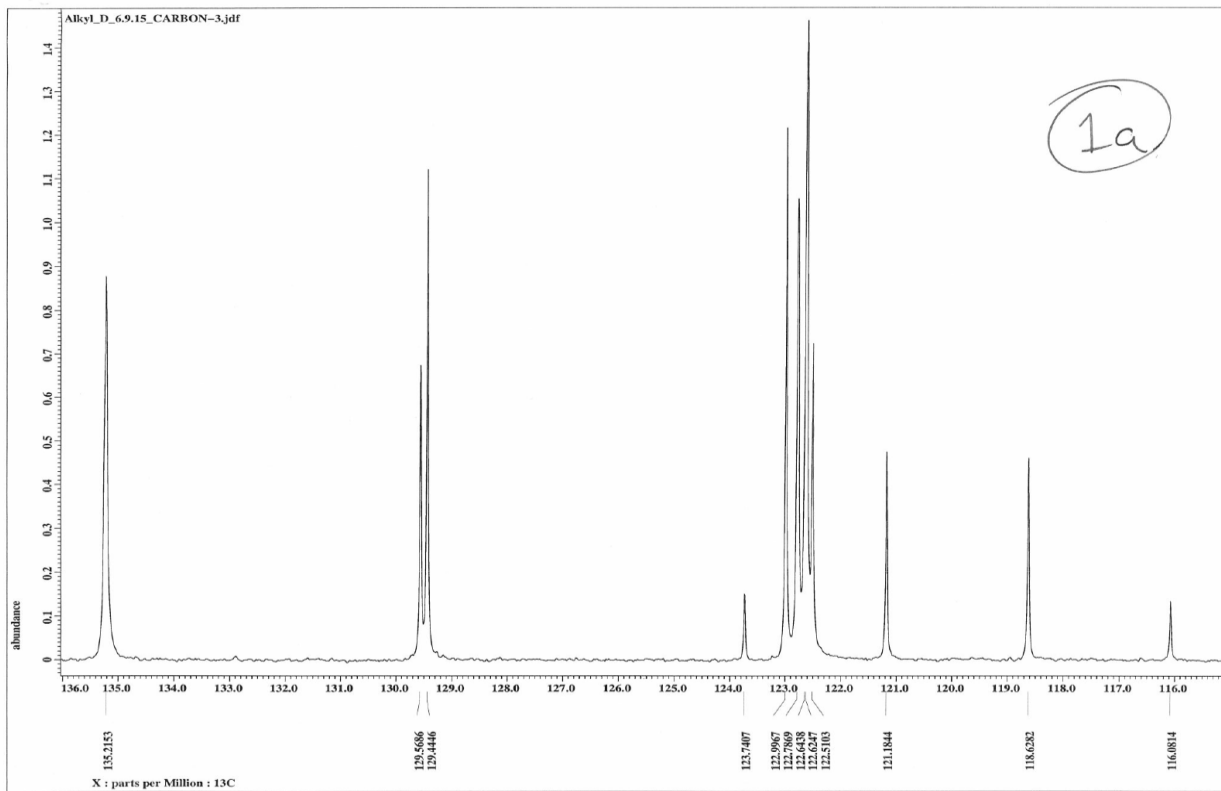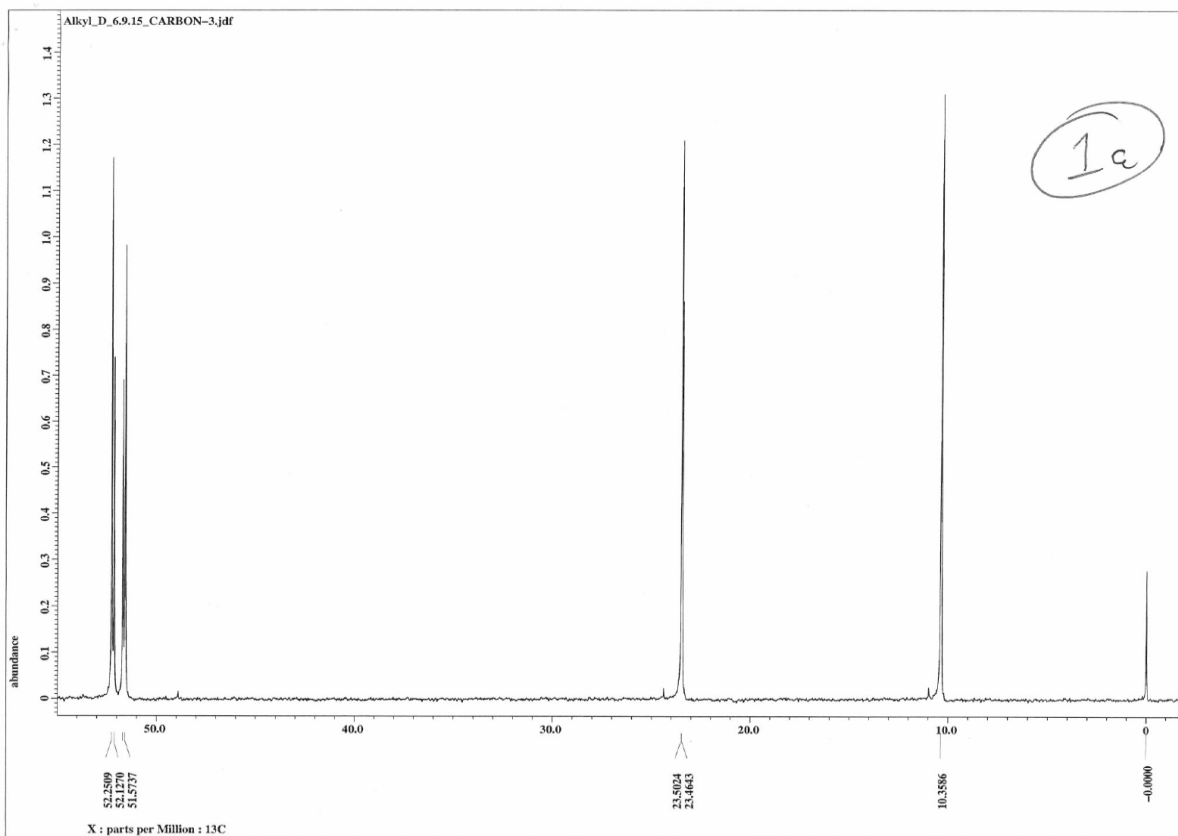



# Allyl-Alkyl

1a

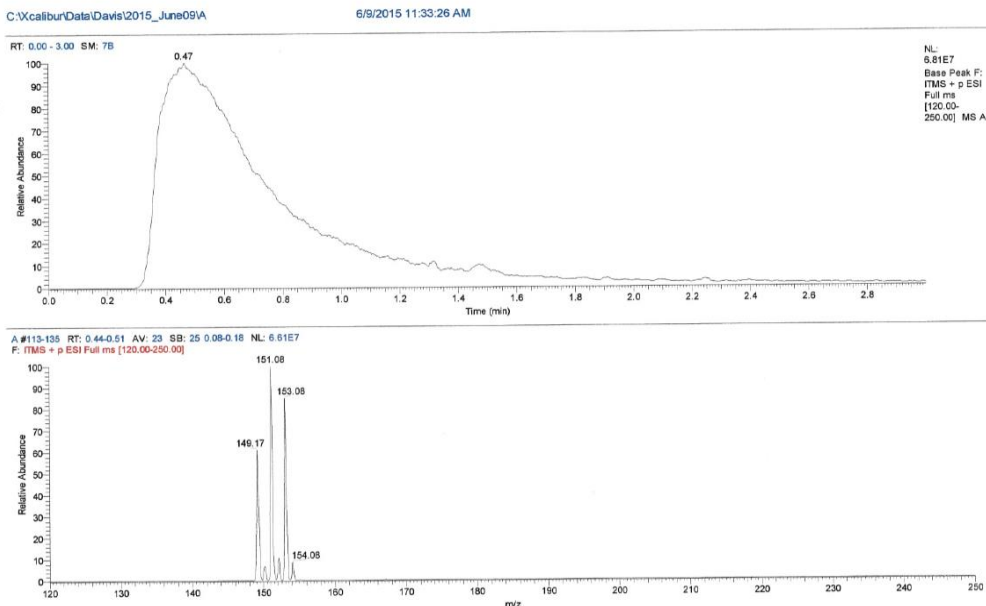

## Atlantic Microlab, Inc.

No. JD Propyl Allyl 1 Batch A

Atlantic Blvd. Suite M  
 Mobile, GA 30071  
 atlanticmicrolab.com

Company/School University of South Alabama

Dept. Chemistry

Address Chem 223, USA Campus

City, State, Zip Mobile, AL, 36688

Analyst/Supervisor: Davis

Name James Davis

Date 06/04/2015

C# \_\_\_\_\_

Phone (251) 751-0520

| Element | Theory | Found | Single <input checked="" type="checkbox"/> | Duplicate <input type="checkbox"/> |
|---------|--------|-------|--------------------------------------------|------------------------------------|
| C       | 30.63  | 30.84 |                                            |                                    |
| H       | 3.51   | 3.56  |                                            |                                    |
| N       | 9.74   | 9.75  |                                            |                                    |
|         |        |       |                                            |                                    |
|         |        |       |                                            |                                    |
|         |        |       |                                            |                                    |

Elements C,H,N,O,S,F  
 Present: \_\_\_\_\_  
 Analyze CHN  
 for: \_\_\_\_\_  
 Hygroscopic  Explosive   
 M.P. LIQUID B.P. NONE  
 To be dried: Yes  No   
 Temp. 80 Vac. HIGH Time >4 HRS  
 Rush Service  Rush service guarantees analyses will be completed and results available by 5 PM EST on the day the sample is received by 11 AM.  
 Include Email Address or FAX # Below  
jdavis@southalabama.edu

Received JUN 08 2015 Date Completed JUN 08 2015

Remarks: 1a batch 1

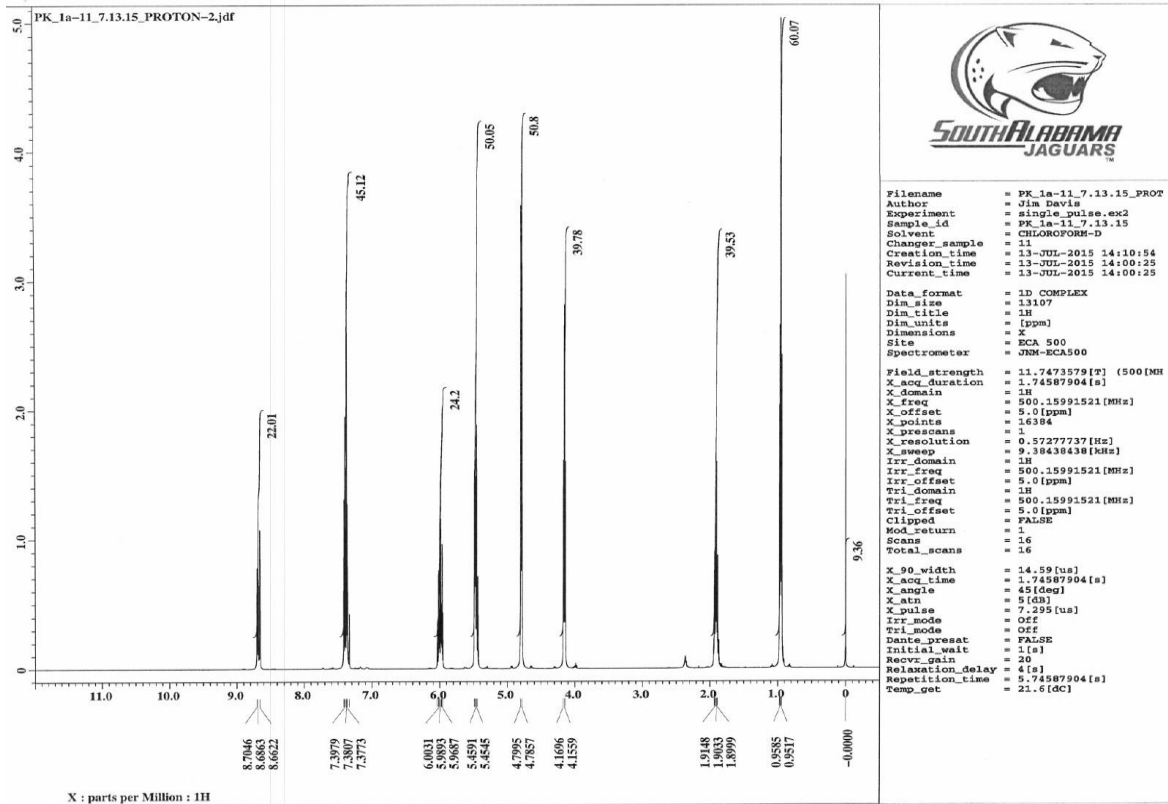

1a b2

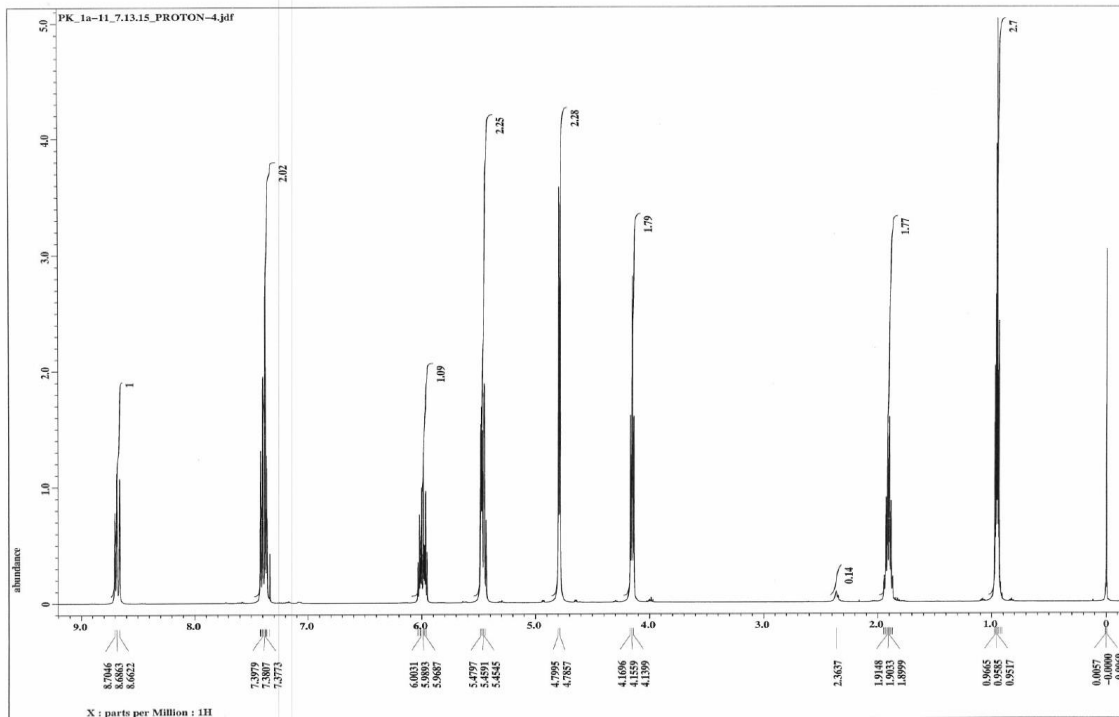

1a b2

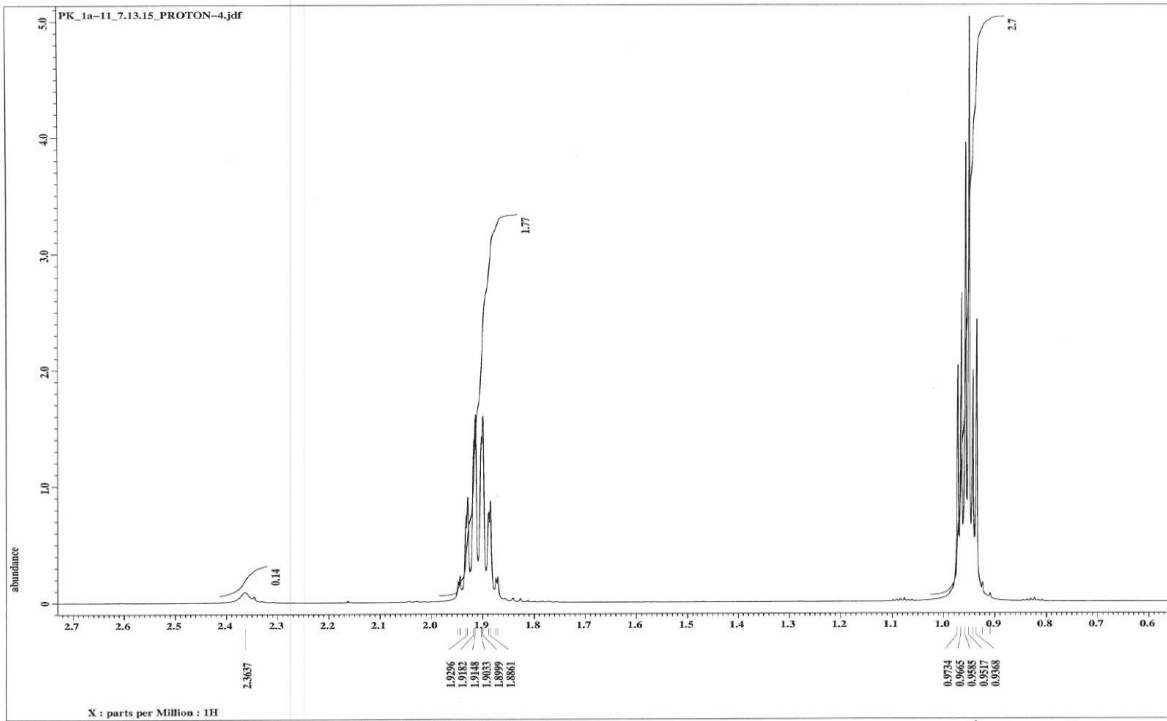

1a b2

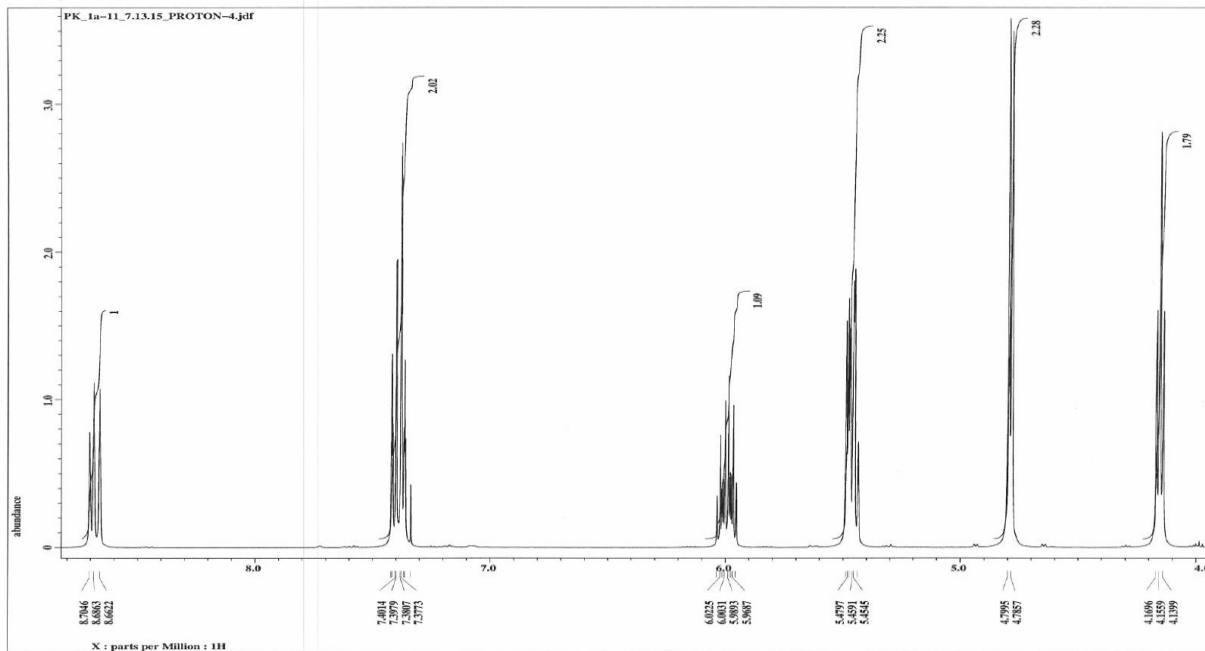

1a b2

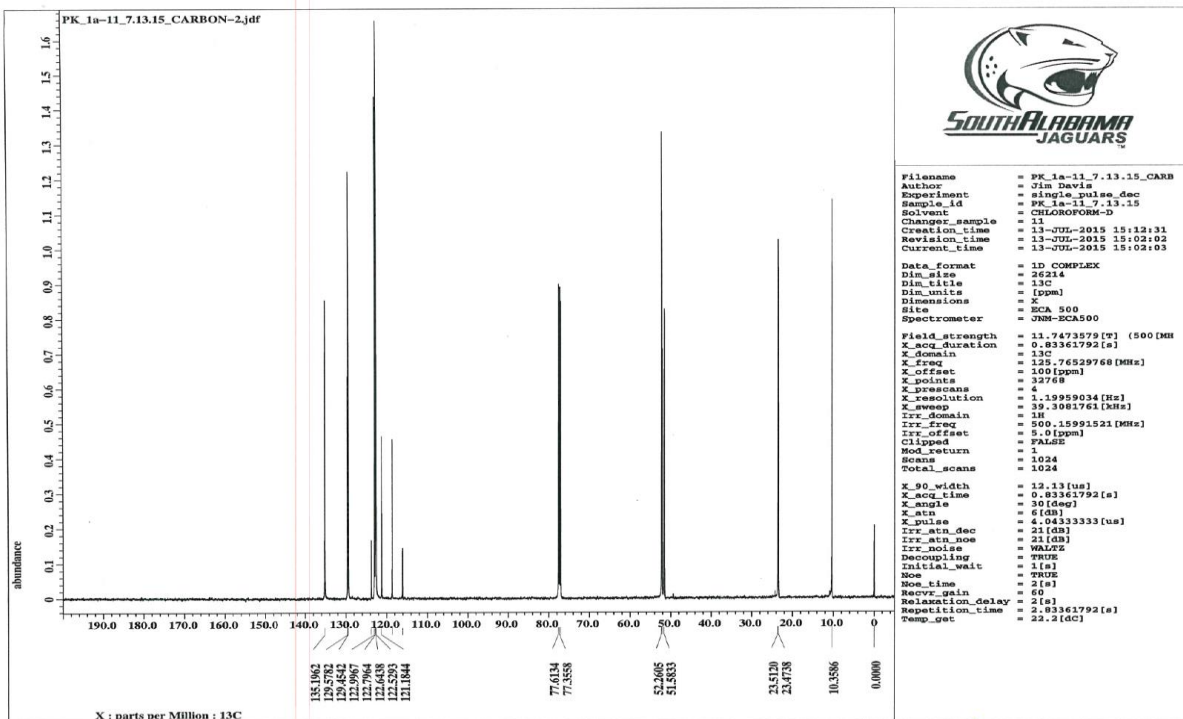

1a b2

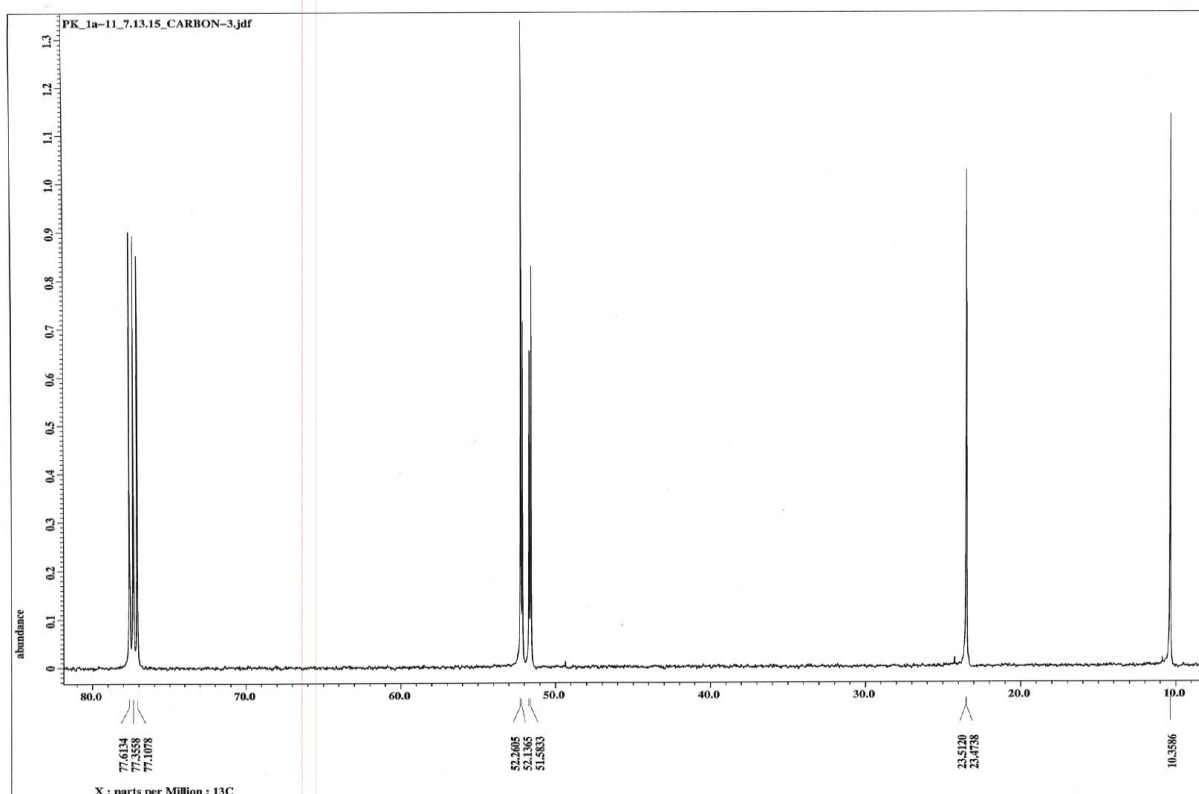

1a b2

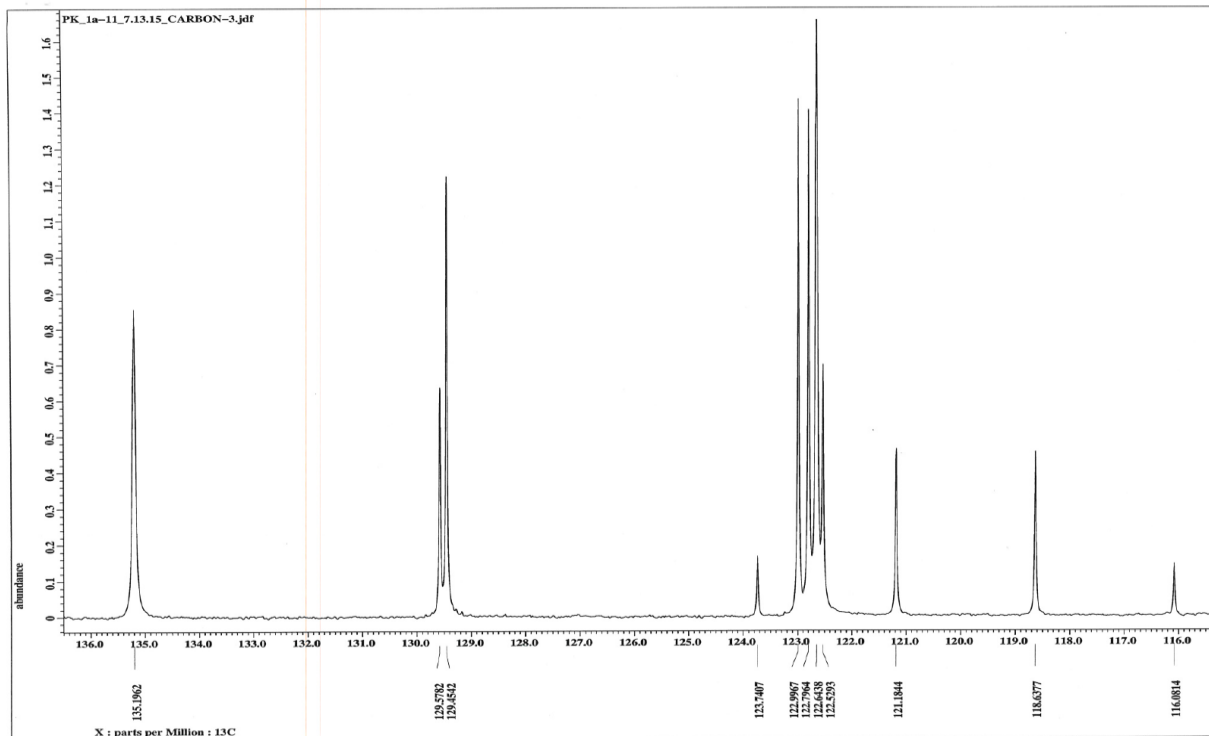

1a b2

1a b2

1ab2 #89-104 RT: 0.32-0.37 AV: 16 SB: 37 0.09-0.22 NL: 4.62E7  
 T: (TMS + p ESI)Full.ms [120.00-350.00]

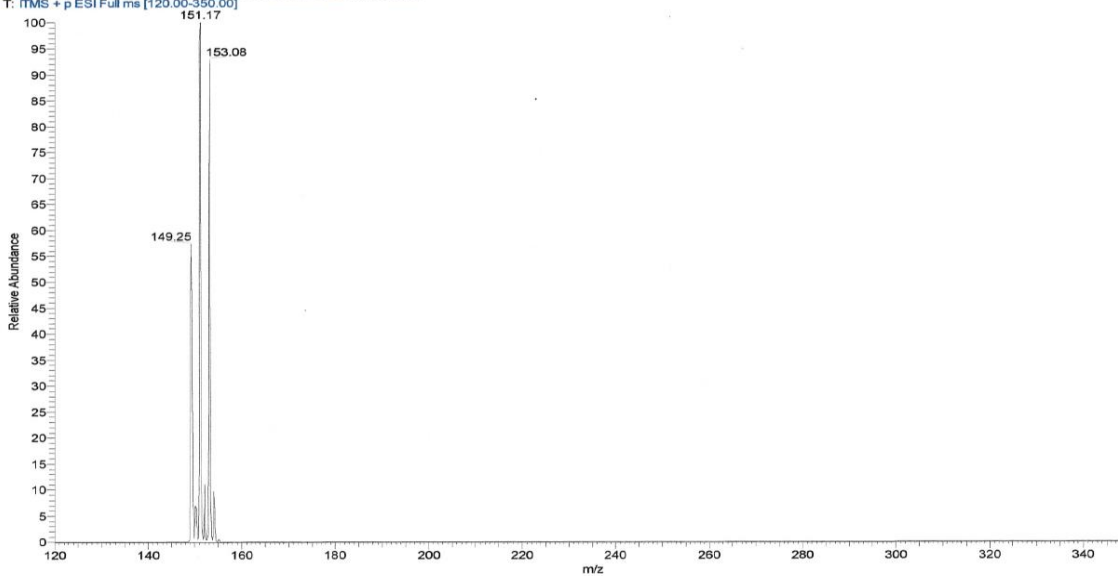

# Atlantic Microlab, Inc.

No. JD Propyl Allyl Batch B  
 Atlantic Blvd. Suite M 1  
 Moss, GA 30071  
 atlanticmicrolab.com

Company/School South Alabama  
 Dept. \_\_\_\_\_  
 Address \_\_\_\_\_  
 City, State, Zip \_\_\_\_\_  
 Name \_\_\_\_\_ Date \_\_\_\_\_  
 Phone JAMES DAVIS

Analyst/Supervisor: Davis  
 Accession #: \_\_\_\_\_

| Element                                                                                                                                                                                                                                                                                                                                                                                                                                                                                                               | Theory | Found | Single <input type="checkbox"/> | Duplicate <input type="checkbox"/> |
|-----------------------------------------------------------------------------------------------------------------------------------------------------------------------------------------------------------------------------------------------------------------------------------------------------------------------------------------------------------------------------------------------------------------------------------------------------------------------------------------------------------------------|--------|-------|---------------------------------|------------------------------------|
| C                                                                                                                                                                                                                                                                                                                                                                                                                                                                                                                     | 30.63  | 30.90 | <input type="checkbox"/>        | <input type="checkbox"/>           |
| H                                                                                                                                                                                                                                                                                                                                                                                                                                                                                                                     | 3.51   | 3.60  | <input type="checkbox"/>        | <input type="checkbox"/>           |
| N                                                                                                                                                                                                                                                                                                                                                                                                                                                                                                                     | 9.74   | 9.56  | <input type="checkbox"/>        | <input type="checkbox"/>           |
| Elements Present: _____<br>Analyze for: <u>CHN</u><br>Hygroscopic <input type="checkbox"/> Explosive <input type="checkbox"/><br>M.P. _____ B.P. _____<br>To be dried: Yes <input checked="" type="checkbox"/> No <input type="checkbox"/><br>Temp. <u>60</u> Vac. <u>High</u> Time <u>24</u><br>Rush Service <input type="checkbox"/> Rush service guarantees analysis will be completed and results available by 5 PM EST on the day the sample is received by 11 AM.<br>Include Email Address or FAX # Below _____ |        |       |                                 |                                    |

Received JUN 08 2015 Date Completed JUN 08 2015  
 Remarks: 1 a batch 2

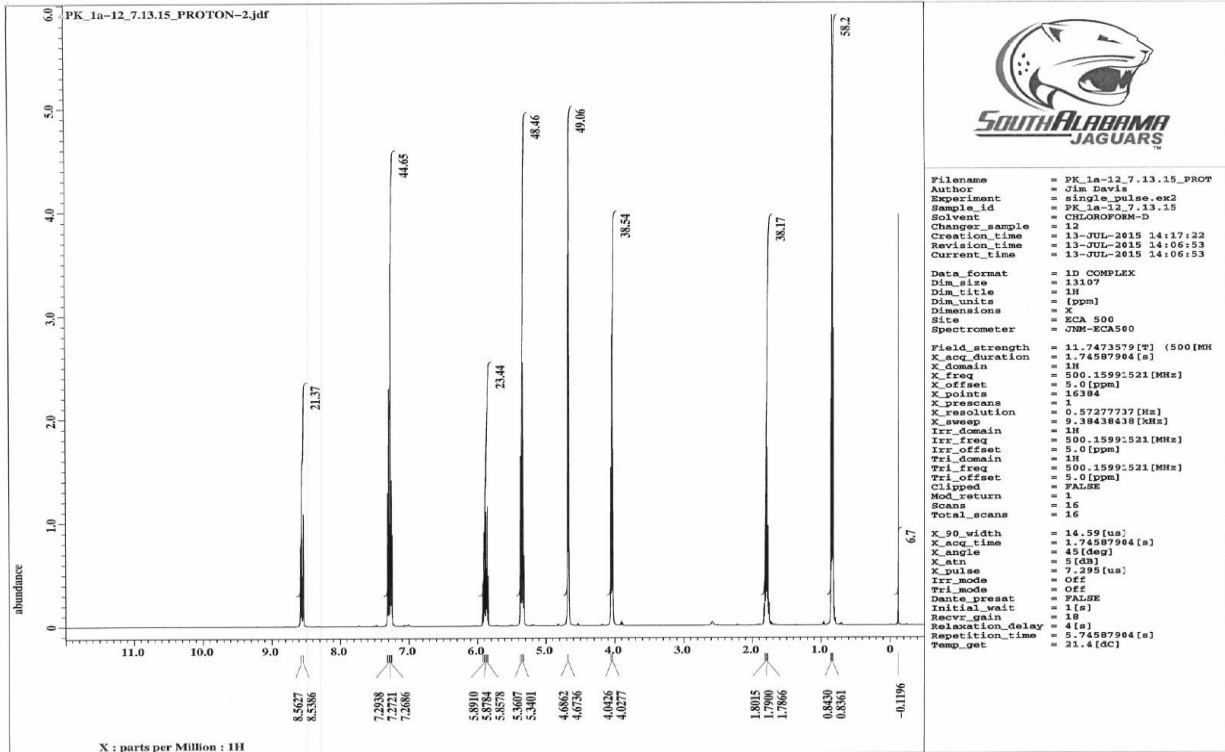

1a b3

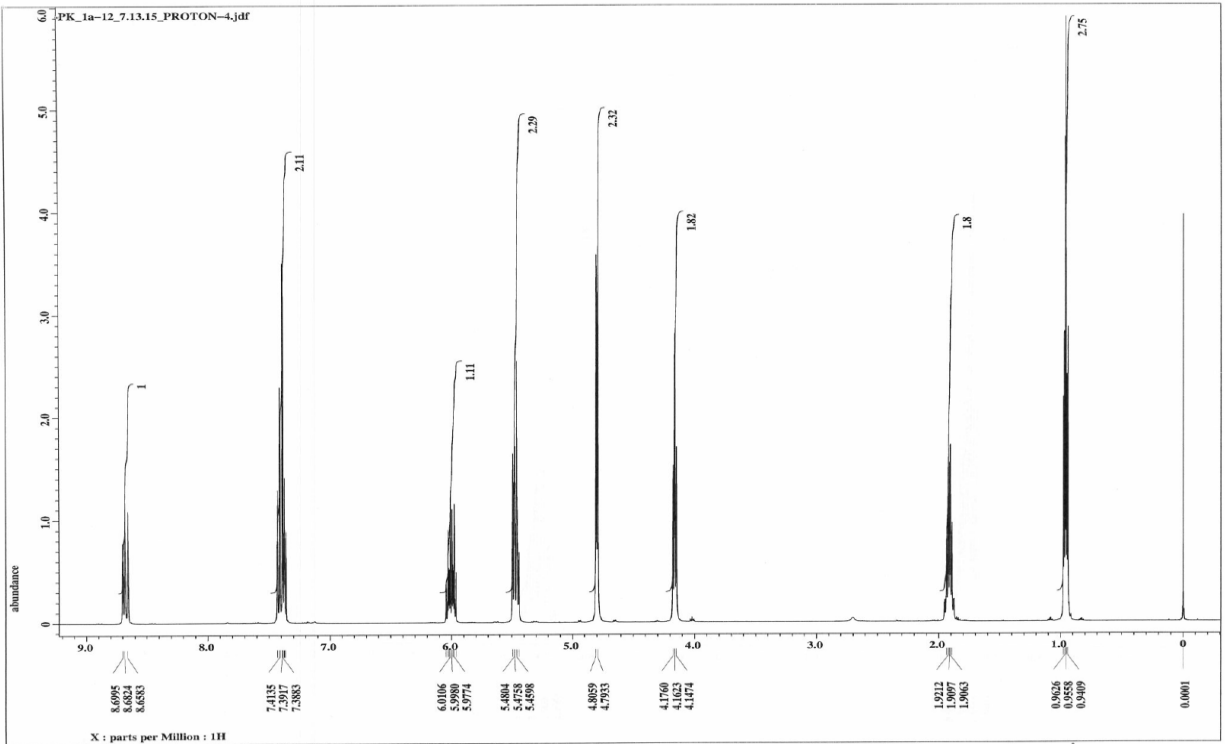

1a b3

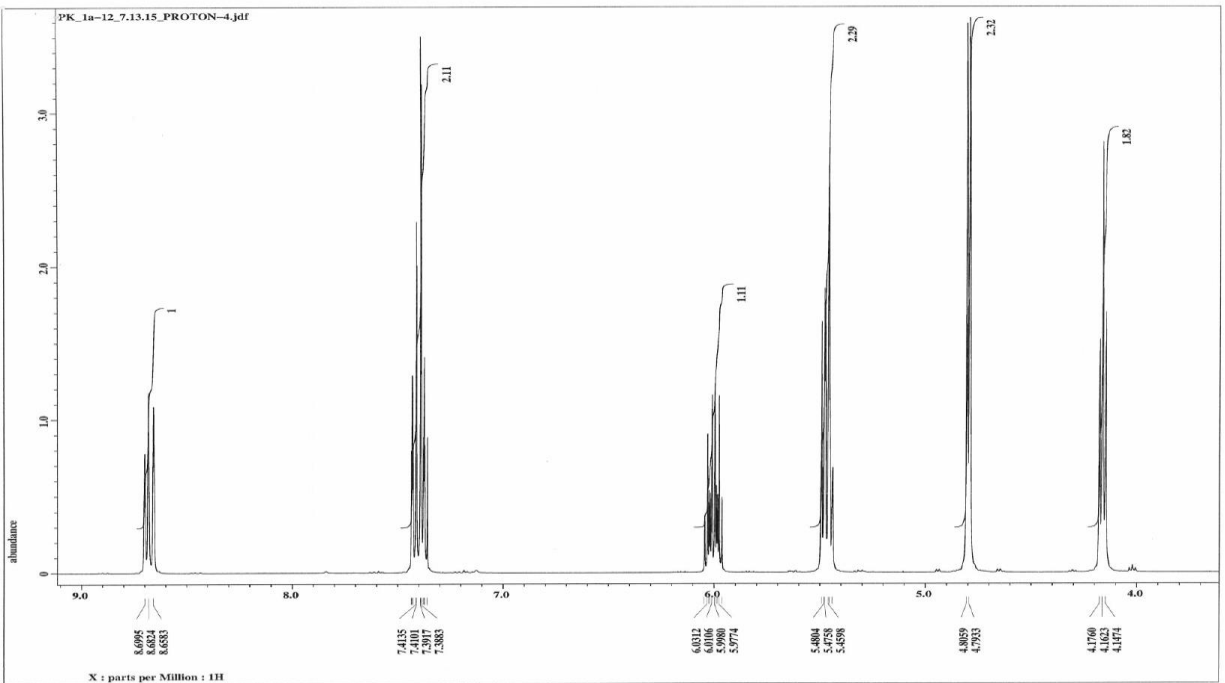

1a b3

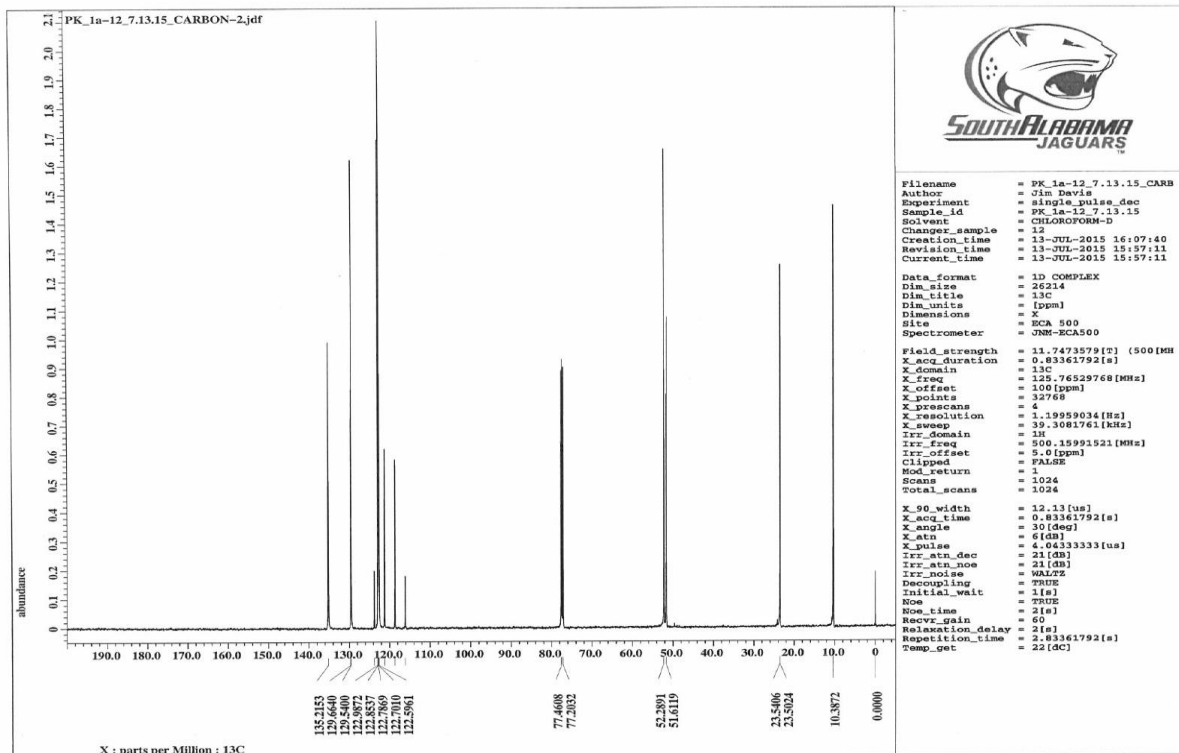

1a b3

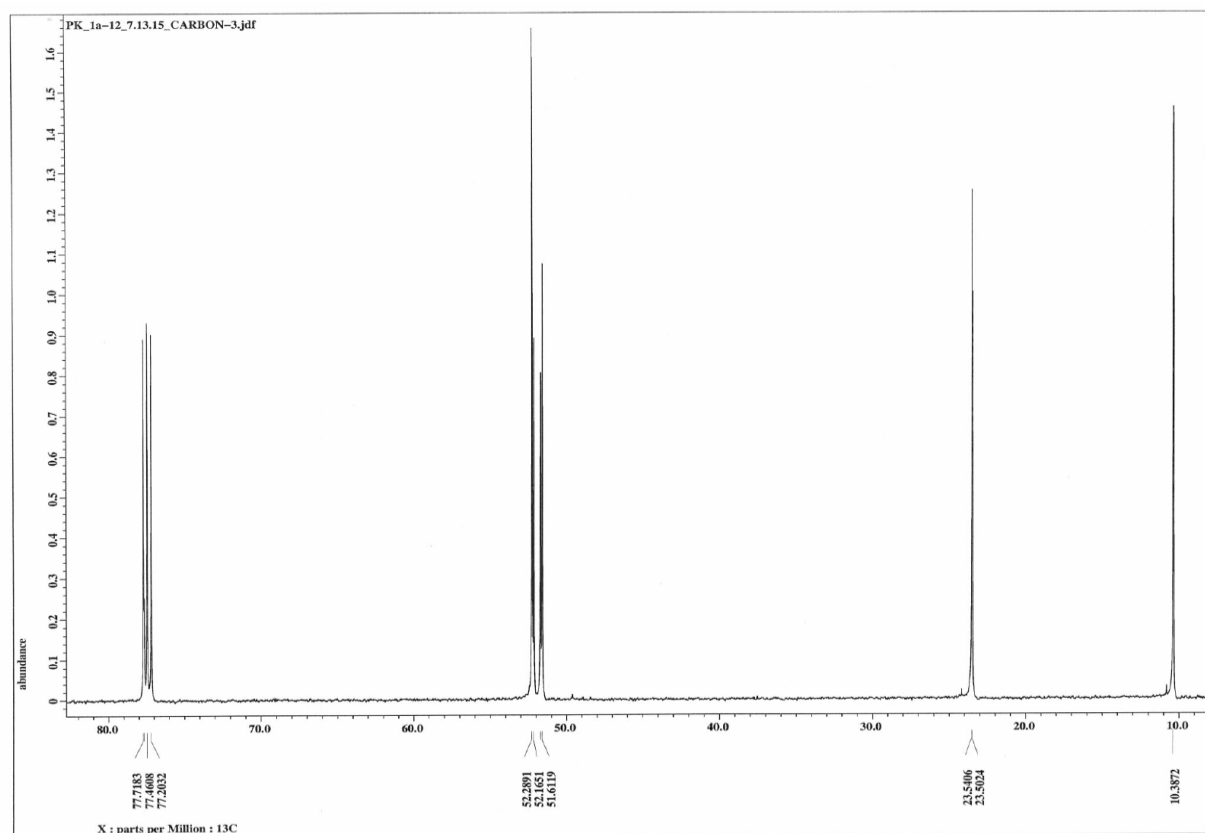

1a b3



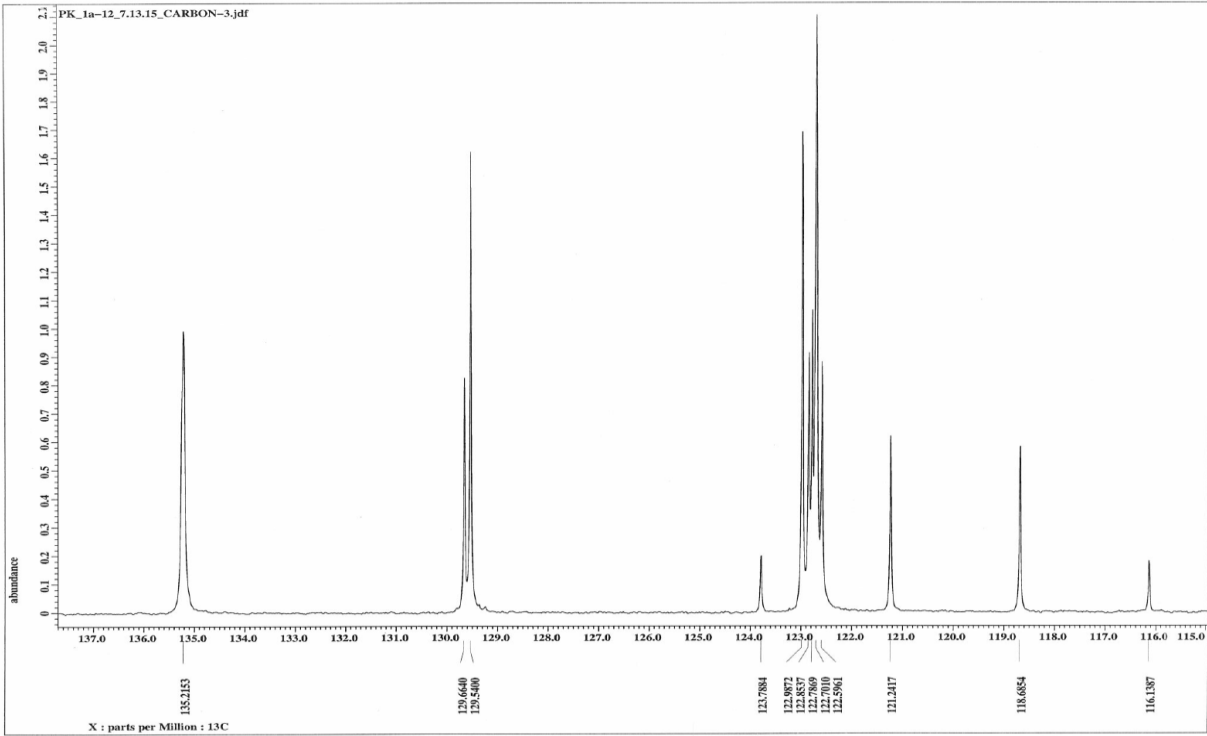

1a b3

1ab3 #100-114 RT: 0.36-0.41 AV: 15 SB: 19 0.13-0.20 NL: 3.83E7  
T: ITMS + p ESI Full ms [120.00-350.00]

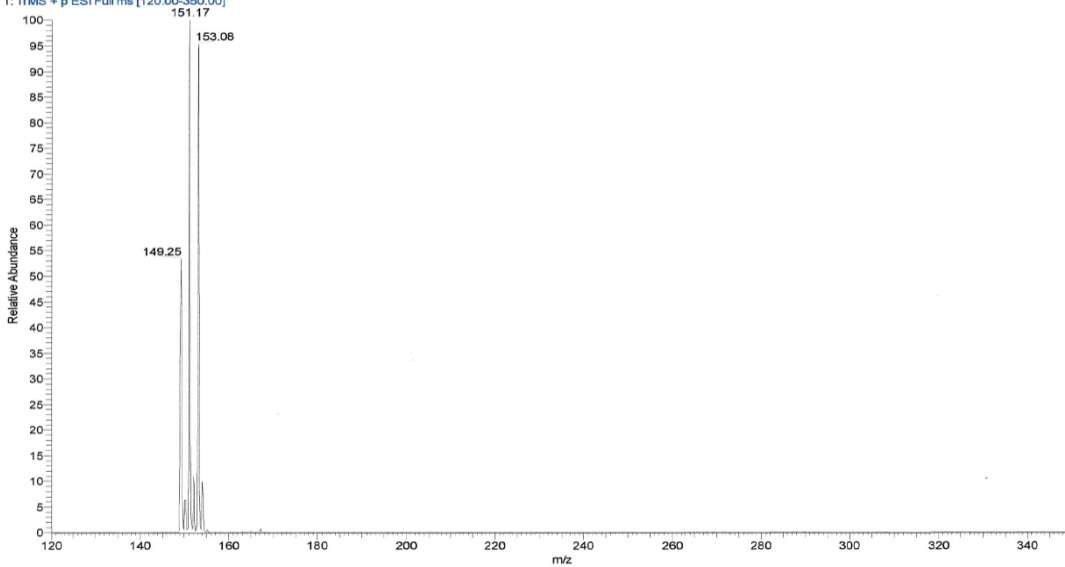

# Atlantic Microlab, Inc.

No. JD (Propyl Allyl 1 Batch C)

Atlantic Blvd. Suite M  
 Mobile, GA 30071  
 atlanticmicrolab.com

Company/School University of South Alabama

Dept. Chemistry

Address Chem 223, USA Campus

City, State, Zip Mobile, AL, 36688

Analyst/Supervisor: Davis

Name James Davis Date 06/04/2015

Phone # \_\_\_\_\_

Phone (251) 751-0520

| Element | Theory | Found | Single <input checked="" type="checkbox"/>                                                                                                                                                       | Duplicate <input type="checkbox"/> |
|---------|--------|-------|--------------------------------------------------------------------------------------------------------------------------------------------------------------------------------------------------|------------------------------------|
|         | 30.63  | 30.67 | Elements C,H,N,O,S,F<br>Present:                                                                                                                                                                 |                                    |
|         | 3.51   | 3.51  | Analyze CHN<br>for:                                                                                                                                                                              |                                    |
|         | 9.74   | 9.66  | Hygroscopic <input type="checkbox"/> Explosive <input type="checkbox"/><br>M.P. <u>LIQUID</u> B.P. <u>NONE</u>                                                                                   |                                    |
|         |        |       | To be dried: Yes <input checked="" type="checkbox"/> No <input type="checkbox"/><br>Temp. <u>60</u> Vac. <u>HIGH</u> Time <u>&gt;4 HRS</u>                                                       |                                    |
|         |        |       | Rush Service <input checked="" type="checkbox"/> <small>Rush service guarantees analyses will be completed and results available by 5 PM EST on the day the sample is received by 11 AM.</small> |                                    |
|         |        |       | Include Email Address or FAX # Below<br>jdavis@southalabama.edu                                                                                                                                  |                                    |

Received JUN 08 2015 Date Completed JUN 08 2015

Notes: 1 a batch, 3

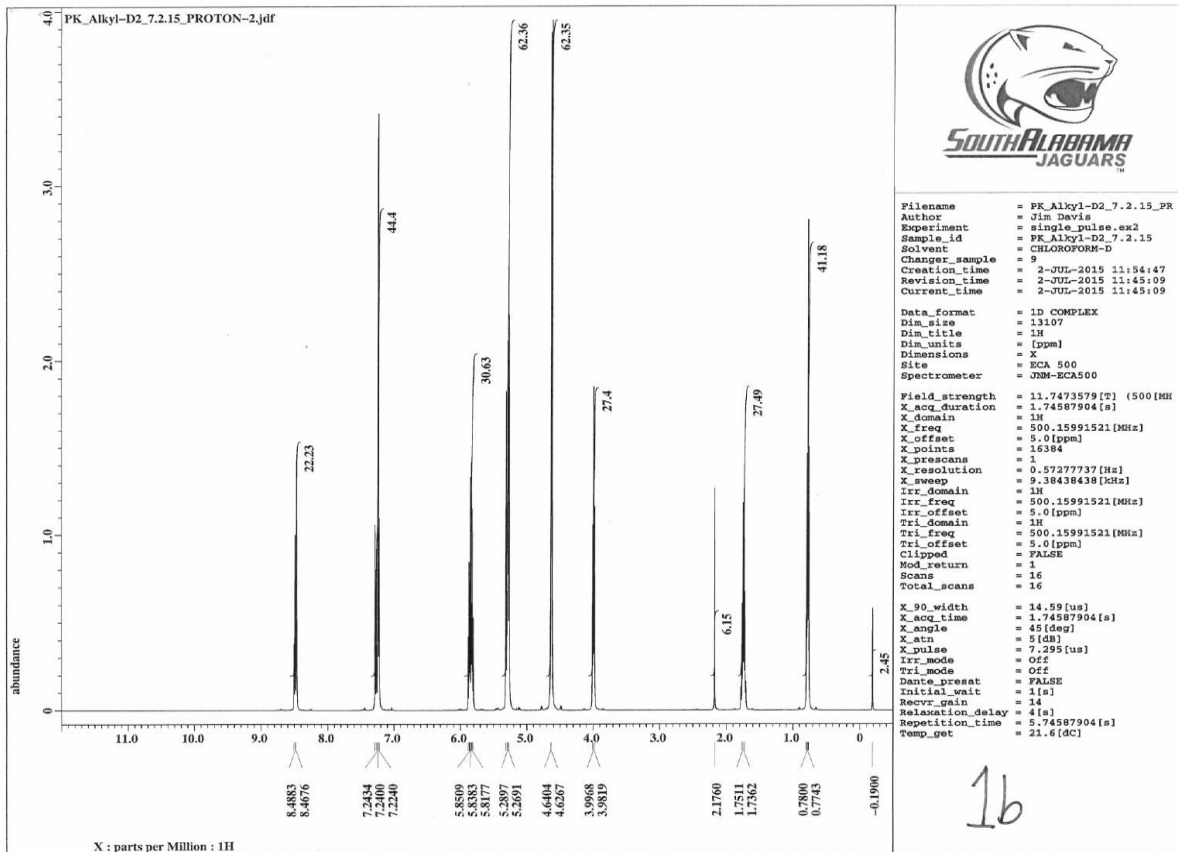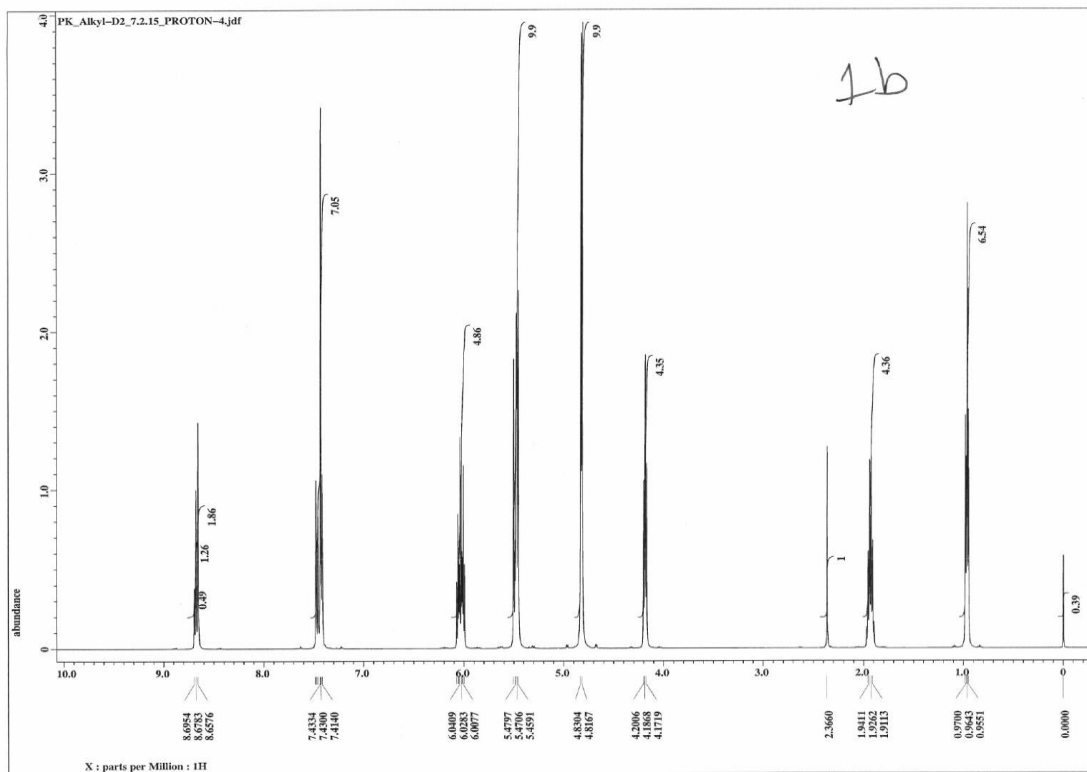

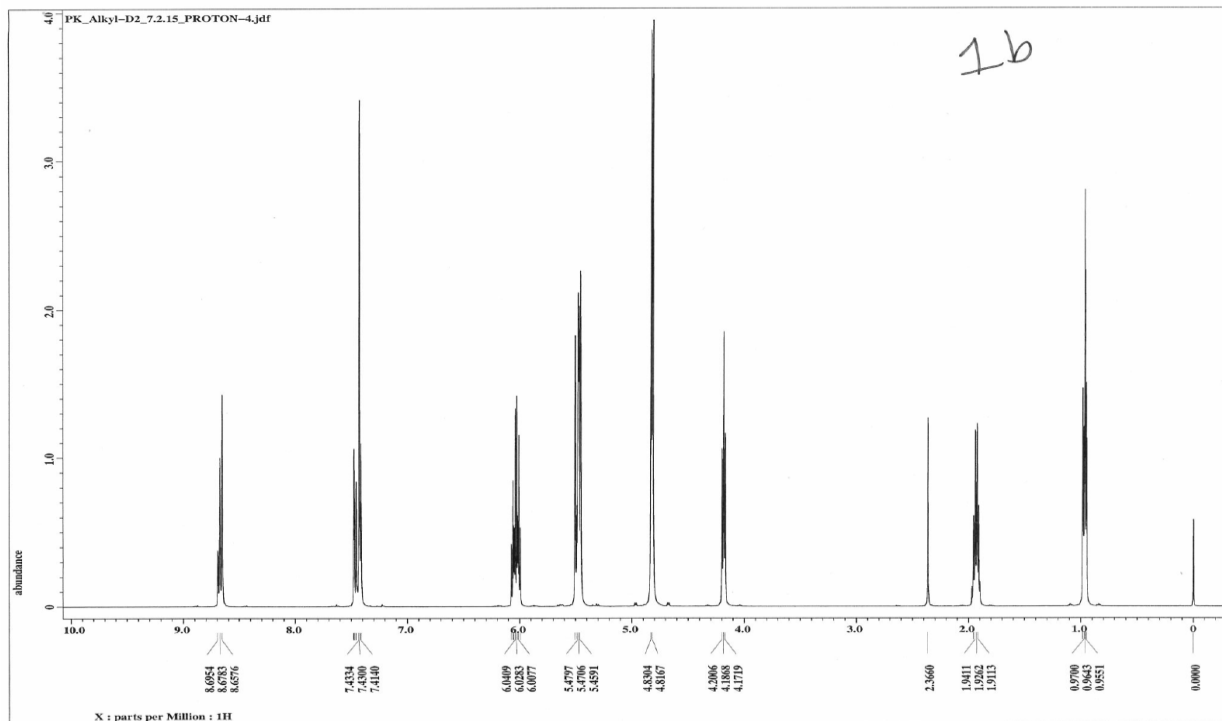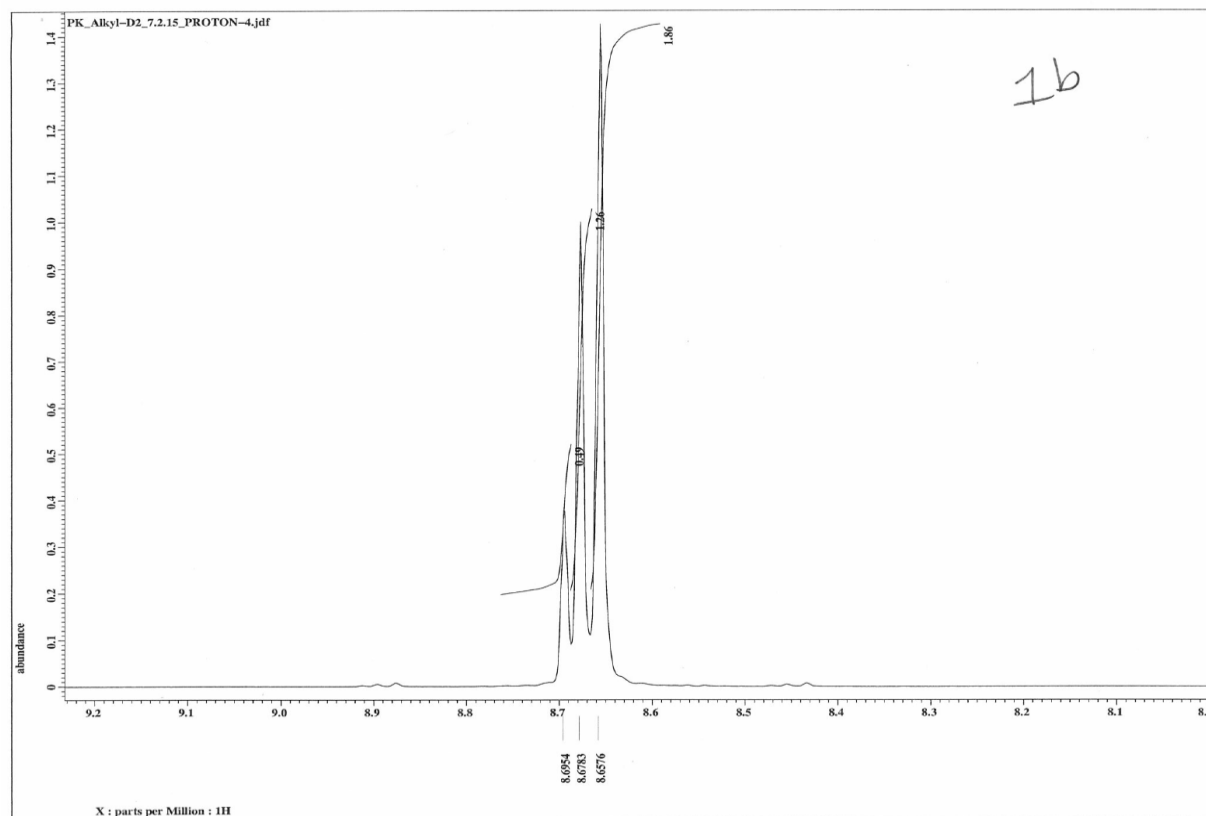

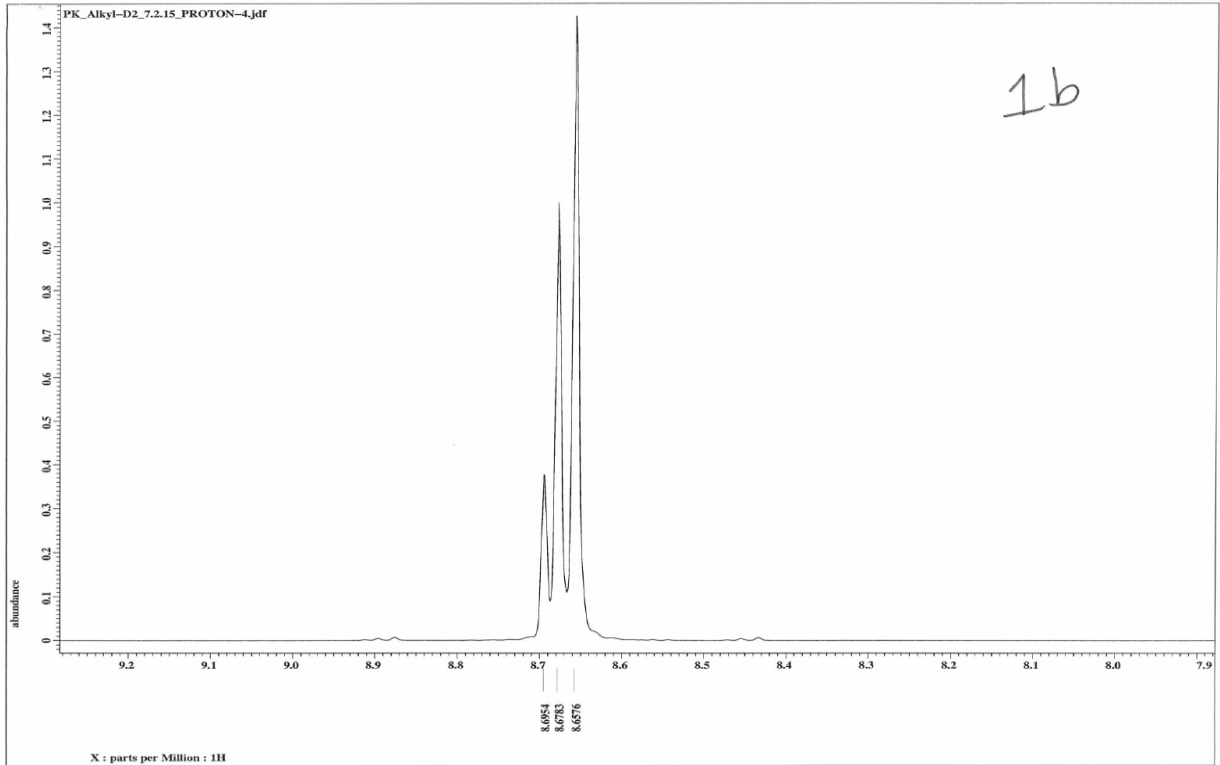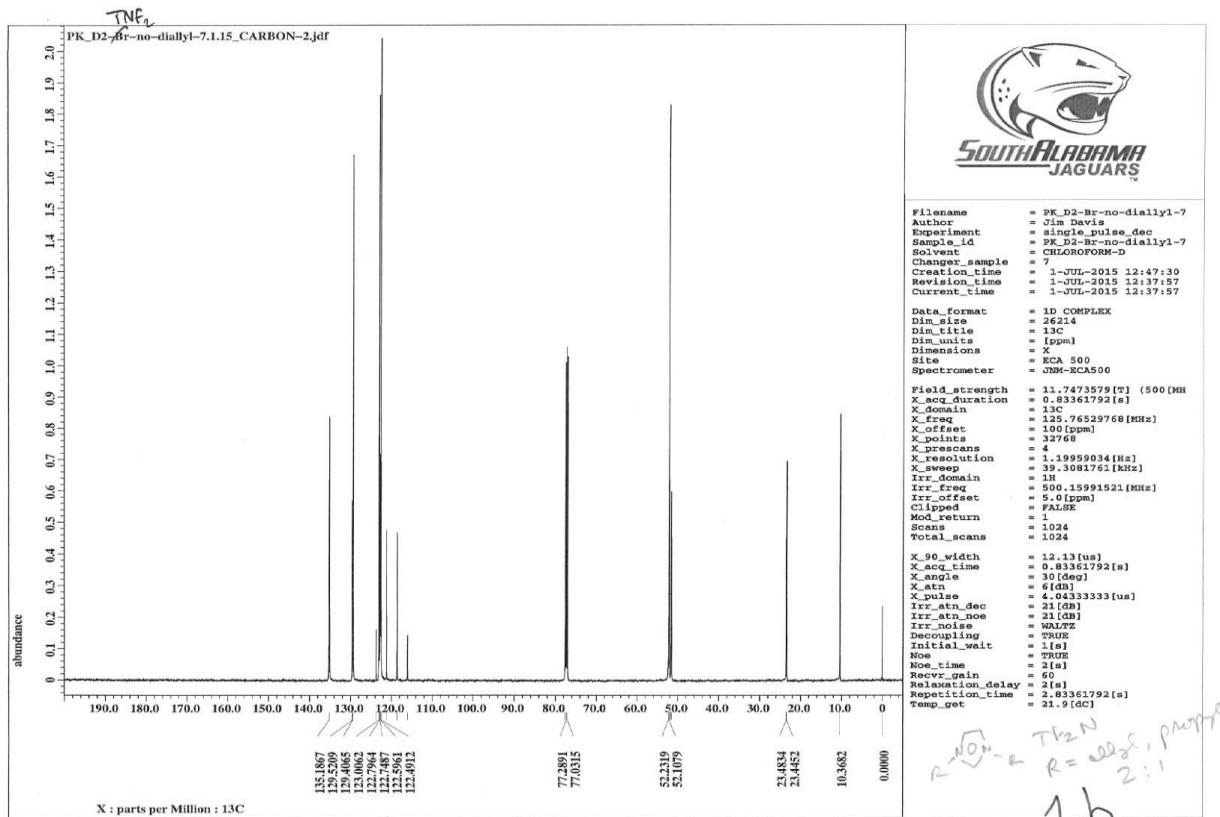

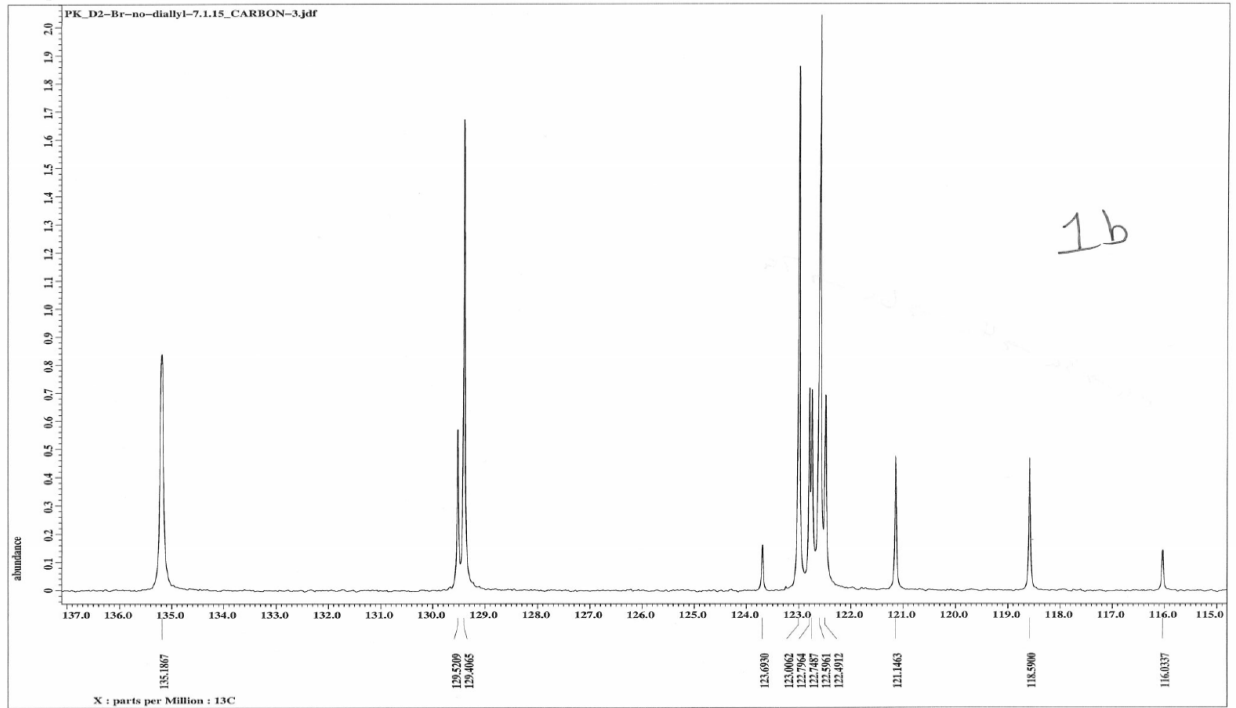

# Smpl 1b

1b #87-101 RT: 0.36-0.41 AV: 15 SB: 16 0.13-0.20 NL: 4.58E7  
T: FTMS + p ES/Full ms [120.00-350.00]

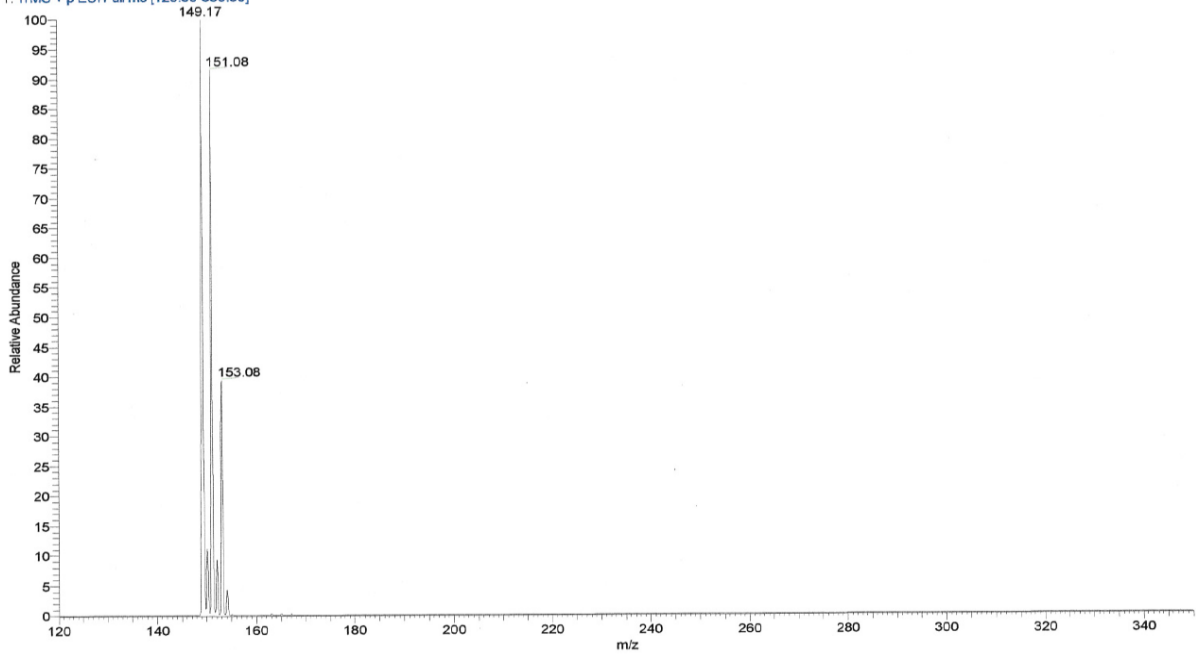

# Atlantic Microlab, Inc.

Sample No. D-2 NT2N

Address: Atlantic Blvd. Suite M  
Dallas, GA 30071  
atlanticmicrolab.com

Company/School: University of South Alabama  
 Dept.: Chemistry  
 Address: Chem Bldg 223 6040 USA Driver South  
 City, State, Zip: Mobile, AL 36688

Analyst/Supervisor: Davis  
 CC#: Z 154679

Name: Jim Davis Date: 07/01/2015  
 Phone: (251) 751-0520

1b

| Element                  | Theory           | Found |       | Single <input checked="" type="checkbox"/>                                                                                                                                                                                                                                                                                                                                                                                                                                                                                                                                      | Duplicate <input type="checkbox"/> |
|--------------------------|------------------|-------|-------|---------------------------------------------------------------------------------------------------------------------------------------------------------------------------------------------------------------------------------------------------------------------------------------------------------------------------------------------------------------------------------------------------------------------------------------------------------------------------------------------------------------------------------------------------------------------------------|------------------------------------|
| C                        | <u>JHD</u> 47.60 | 30.38 | 30.39 | Elements CHNSOF Present:<br>Analyze CHN for:<br>Hygroscopic <input type="checkbox"/> Explosive <input type="checkbox"/><br>M.P. <u>LIQUID</u> B.P. <u>NONE</u><br>To be dried: Yes <input checked="" type="checkbox"/> No <input type="checkbox"/><br>Temp. <u>80C</u> Vac. <u>HIGH</u> Time <u>4HRS</u><br>Rush Service <input checked="" type="checkbox"/> <small>Rush service guarantees analyses will be completed and results available by 5 PM EST on the day the sample is received by 11 AM.</small><br>Include Email Address or FAX # Below<br>jdavis@southalabama.edu |                                    |
| H                        | <u>JHD</u> 5.92  | 3.22  | 3.20  |                                                                                                                                                                                                                                                                                                                                                                                                                                                                                                                                                                                 |                                    |
| N                        | <u>JHD</u> 13.40 | 9.69  | 9.67  |                                                                                                                                                                                                                                                                                                                                                                                                                                                                                                                                                                                 |                                    |
| NO CHARGE FOR DUPLICATES |                  |       |       |                                                                                                                                                                                                                                                                                                                                                                                                                                                                                                                                                                                 |                                    |

Received: \_\_\_\_\_ Date Completed: JUL 02 2015 JUL 02 2015

THE THEORETICAL VALUES WERE MIS-CALCULATED  
 ACTUAL THEORETICAL VALUES ARE C: 30.68, H: 3.35,  
 N: 9.76

JHD

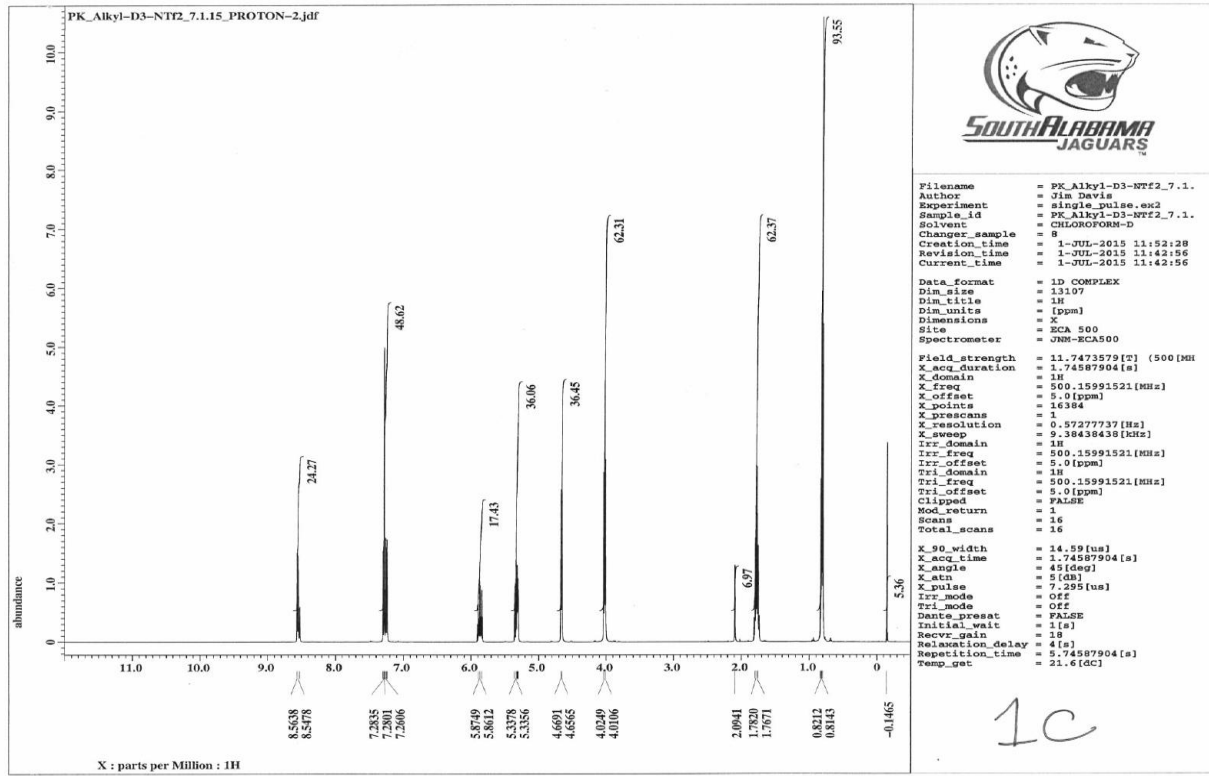

1c

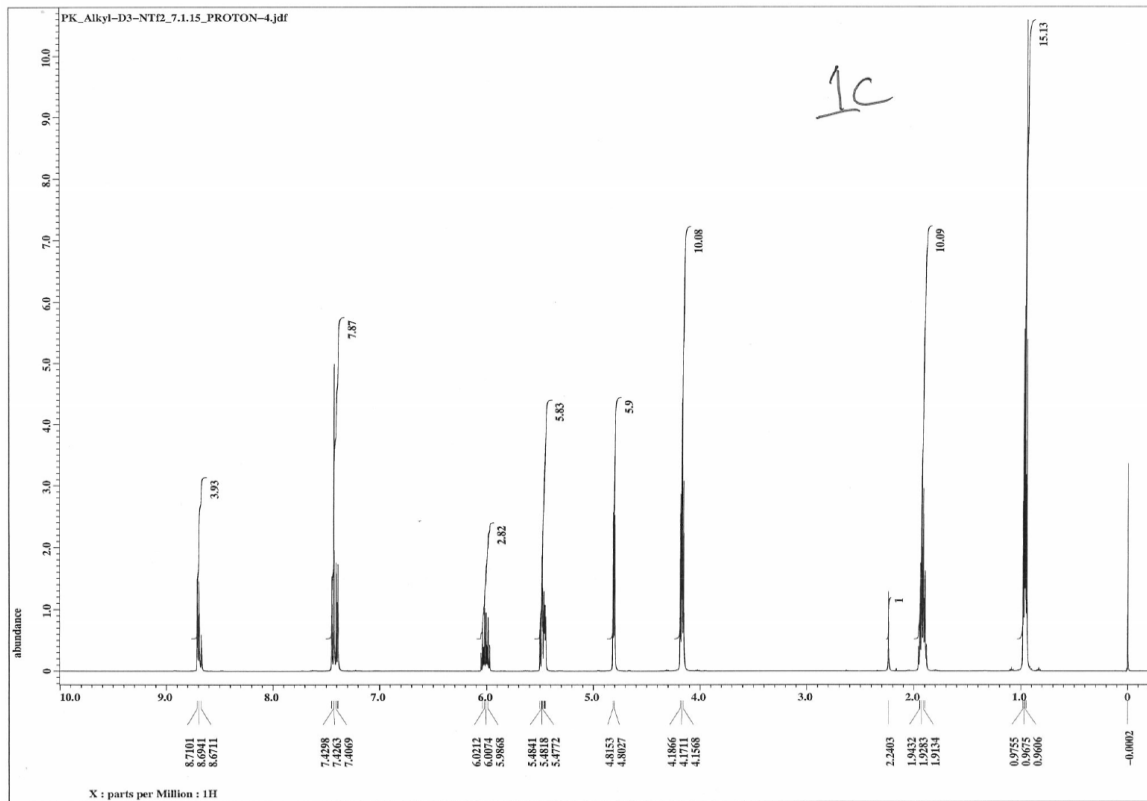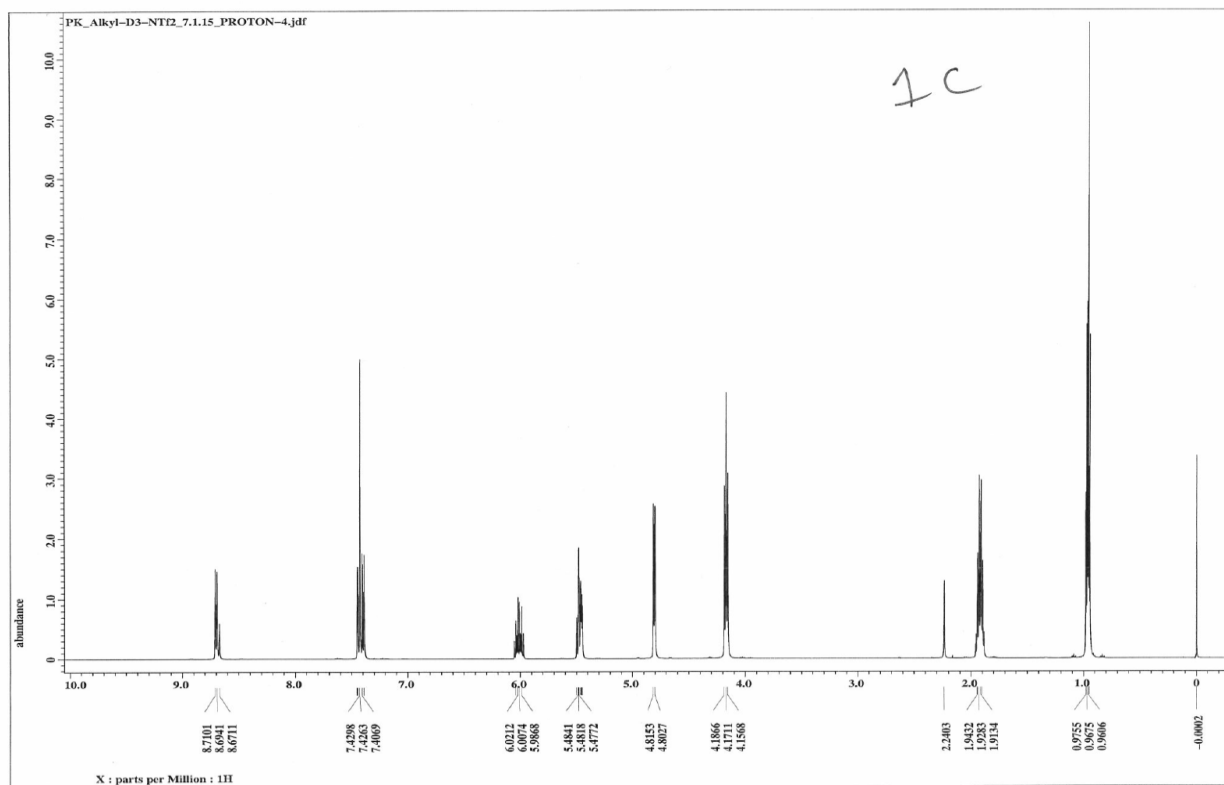



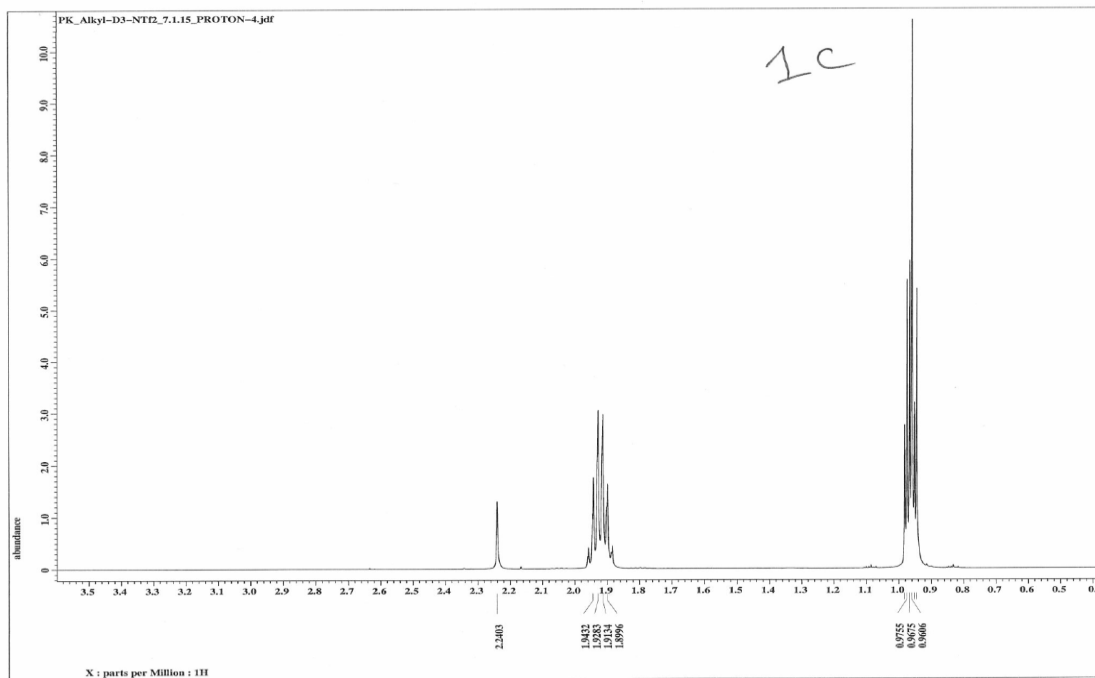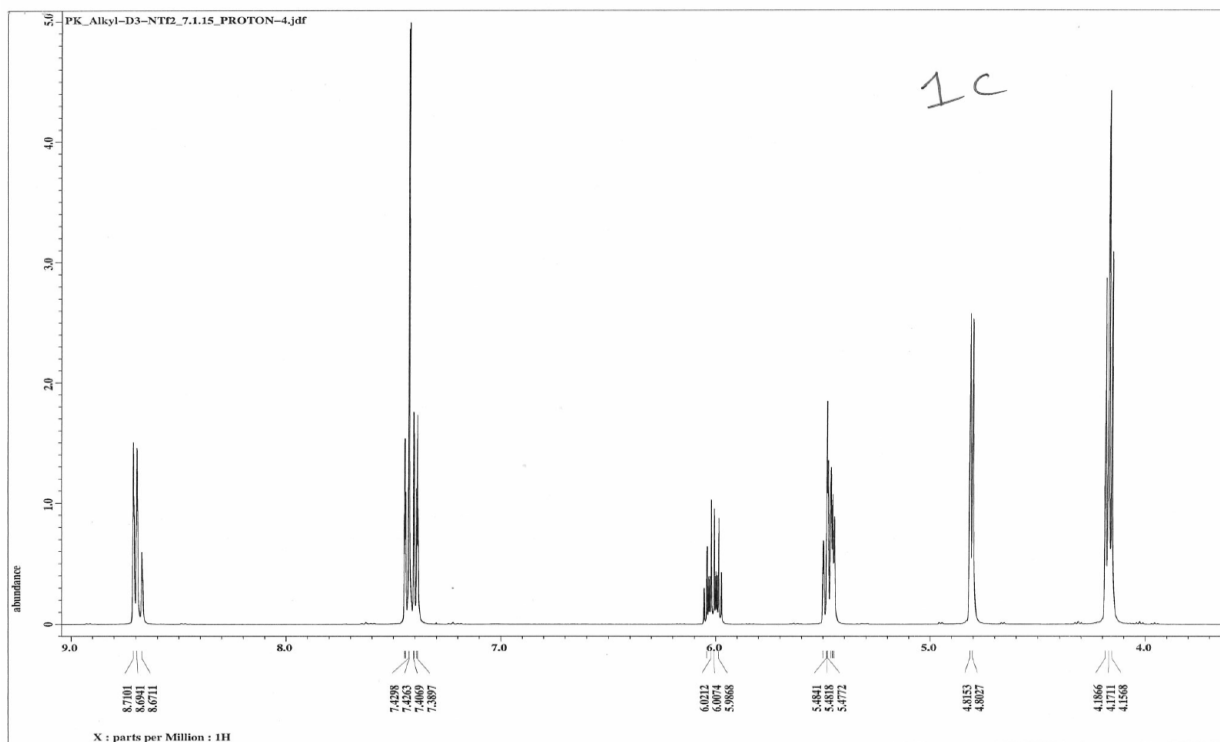

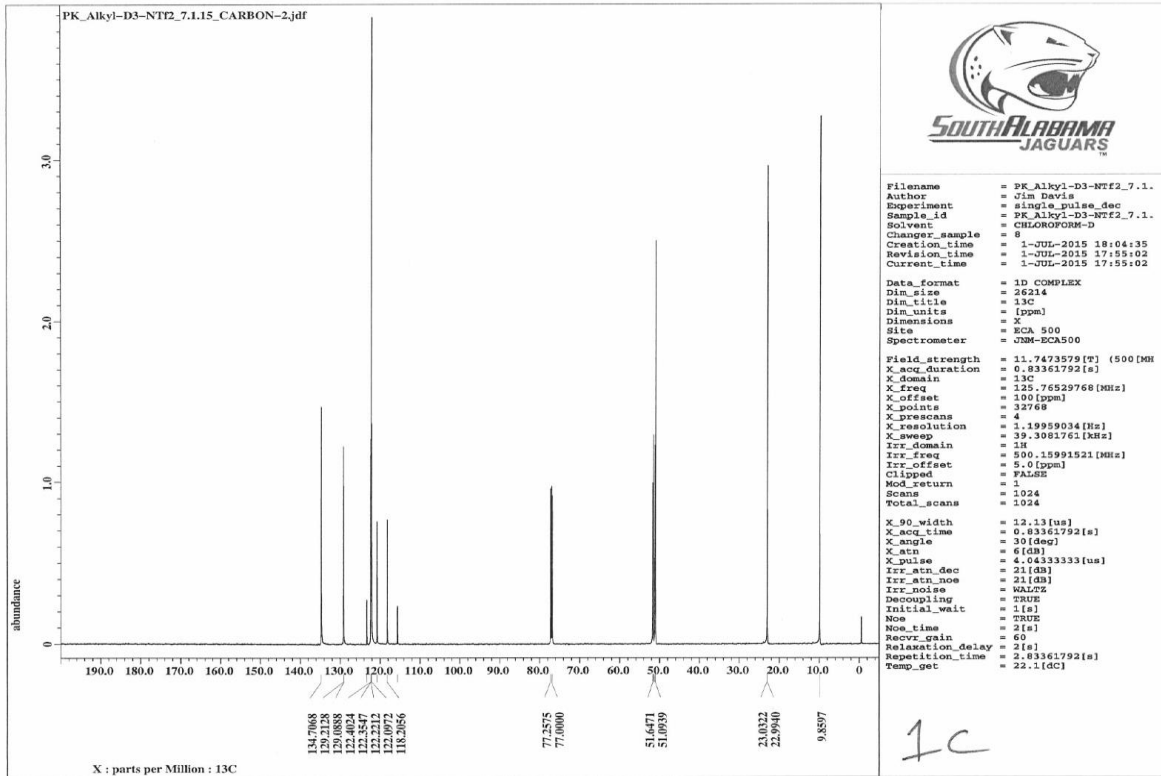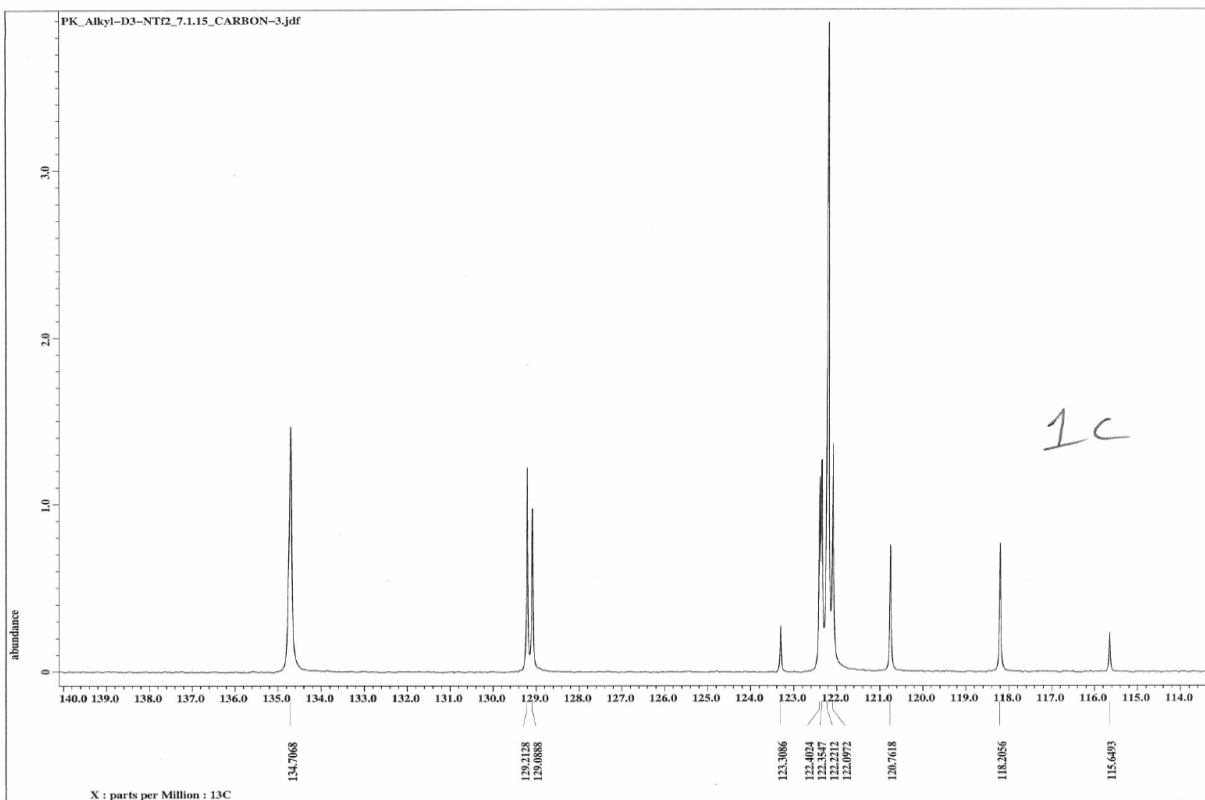

# Smpl 1c

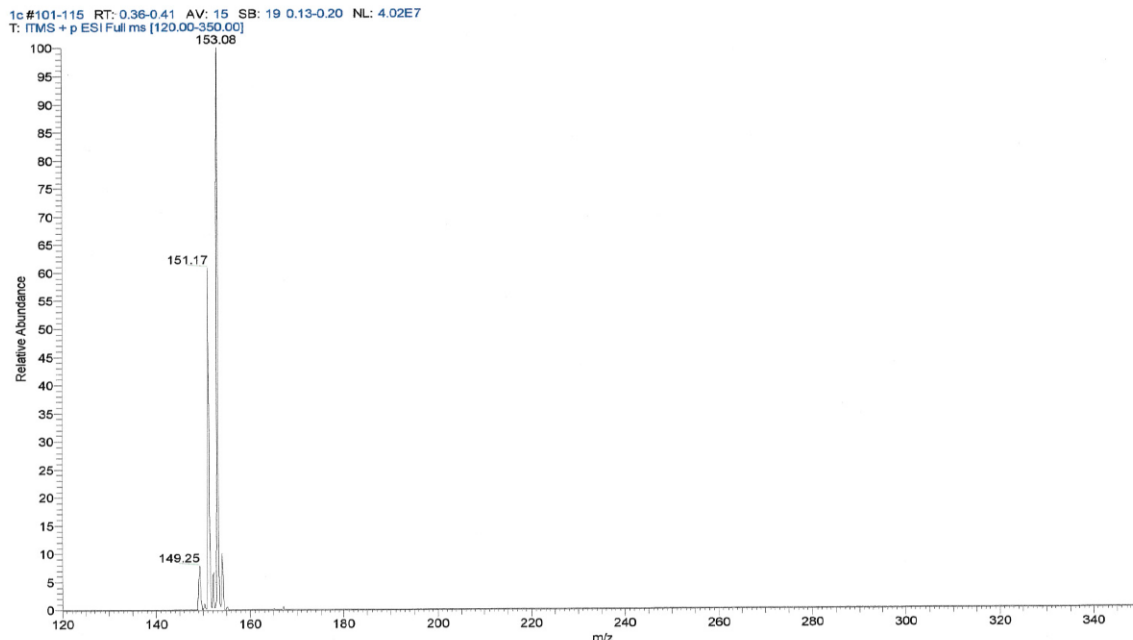

## Atlantic Microlab, Inc.

No. D-3Tf2N

Atlantic Blvd. Suite M  
Mobile, GA 30071  
atlanticmicrolab.com

Company/School University of South Alabama  
Dept. Chemistry

Address Chem Bldg 223 6040 USA Drive South  
City, State, Zip Mobile, AL 36688

Analyst/Supervisor: \_\_\_\_\_

Name Jim Davis Date 07/01/2015

Phone # \_\_\_\_\_

Phone (251) 751-0520

| Element                                                                | Theory       | Found                    |       | Single <input checked="" type="checkbox"/>                                                                                                                                                       | Duplicate <input type="checkbox"/> |
|------------------------------------------------------------------------|--------------|--------------------------|-------|--------------------------------------------------------------------------------------------------------------------------------------------------------------------------------------------------|------------------------------------|
| <u>JHD</u>                                                             | <u>47.34</u> | 30.61                    | 30.55 | Elements CHNOSF Present:                                                                                                                                                                         |                                    |
| <u>JHD</u>                                                             | <u>6.44</u>  | 3.62                     | 3.52  | Analyze CHN for:                                                                                                                                                                                 |                                    |
| <u>JHD</u>                                                             | <u>13.32</u> | 9.64                     | 9.65  | Hygroscopic <input type="checkbox"/> Explosive <input type="checkbox"/><br>M.P. <u>LIQUID</u> B.P. <u>NONE</u>                                                                                   |                                    |
|                                                                        |              | NO CHARGE FOR DUPLICATES |       | To be dried: Yes <input checked="" type="checkbox"/> No <input type="checkbox"/><br>Temp. <u>60C</u> Vac. <u>HIGH</u> Time <u>4 HRS</u>                                                          |                                    |
|                                                                        |              |                          |       | Rush Service <input checked="" type="checkbox"/> <small>Rush service guarantees analyses will be completed and results available by 5 PM EST on the day the sample is received by 11 AM.</small> |                                    |
| Include Email Address or FAX # Below<br><u>jdavis@southalabama.edu</u> |              |                          |       |                                                                                                                                                                                                  |                                    |

Received \_\_\_\_\_  
Notes: \_\_\_\_\_

Date Completed \_\_\_\_\_

JUL 02 2015

JUL 02 2015

THESE THEORETICAL VALUES WERE MIS-CALCULATED.  
ACTUAL THEORETICAL VALUES ARE C: 30.58, H: 3.66, N: 9.73

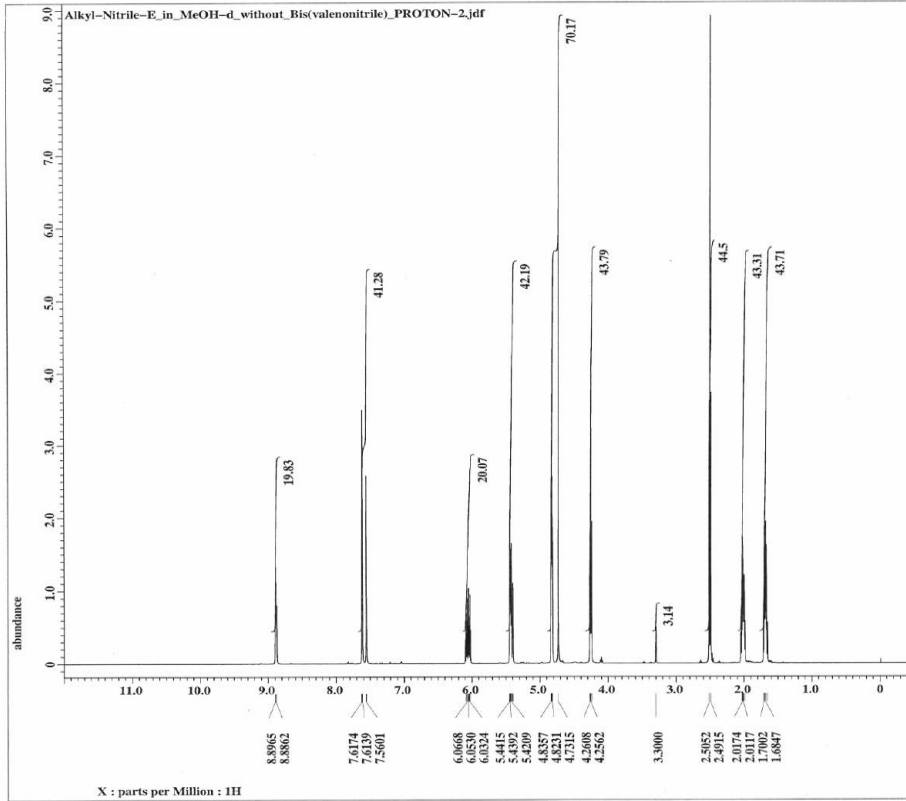


```

Filename = Alkyl-Nitrile-E_in_Me
Author = Jim Davis
Experiment = single_pulse.ex2
Sample_id = Alkyl-Nitrile-E_in_Me
Solvent = METHANOL-D3
Changer_sample = 7
Creation_time = 29-JUN-2015 13:04:21
Revision_time = 29-JUN-2015 12:54:58
Current_time = 29-JUN-2015 12:54:58

Data_format = 1D_COMPLEX
Dim_size = 13107
Dim_title = 1H
Dim_units = [ppm]
Dimensions = X
Site = ECA 500
Spectrometer = JNM-ECA500

Field_strength = 11.747379 [T] (500 MHz)
X_acq_duration = 1.74587904 [s]
X_domain = 1H
X_freq = 500.15991521 [MHz]
X_offset = 5.0 [ppm]
X_points = 16384
X_prescans = 1
X_resolution = 0.57277737 [Hz]
X_sweep = 9.38438438 [kHz]
X_acq = 1H
Xrr_domain = 1H
Xrr_freq = 500.15991521 [MHz]
Xrr_offset = 5.0 [ppm]
Xrr_domain = 1H
Xrr_freq = 500.15991521 [MHz]
Xrr_offset = 5.0 [ppm]
Clipped = FALSE
Mod_return = 1
Scans = 16
Total_scans = 16
X_90_width = 14.59 [us]
X_acq_time = 1.74587904 [s]
X_angle = 45 [deg]
X_atn = 5 [dB]
X_pulse = 7.295 [us]
Xrr_mode = off
Xrr_mode = off
Dante_preset = FALSE
Initial_wait = [s]
Recvr_gain = 26
Relaxation_delay = 4 [s]
Repetition_time = 5.74587904 [s]
Temp_get = 22.1 [deg]
  
```

2

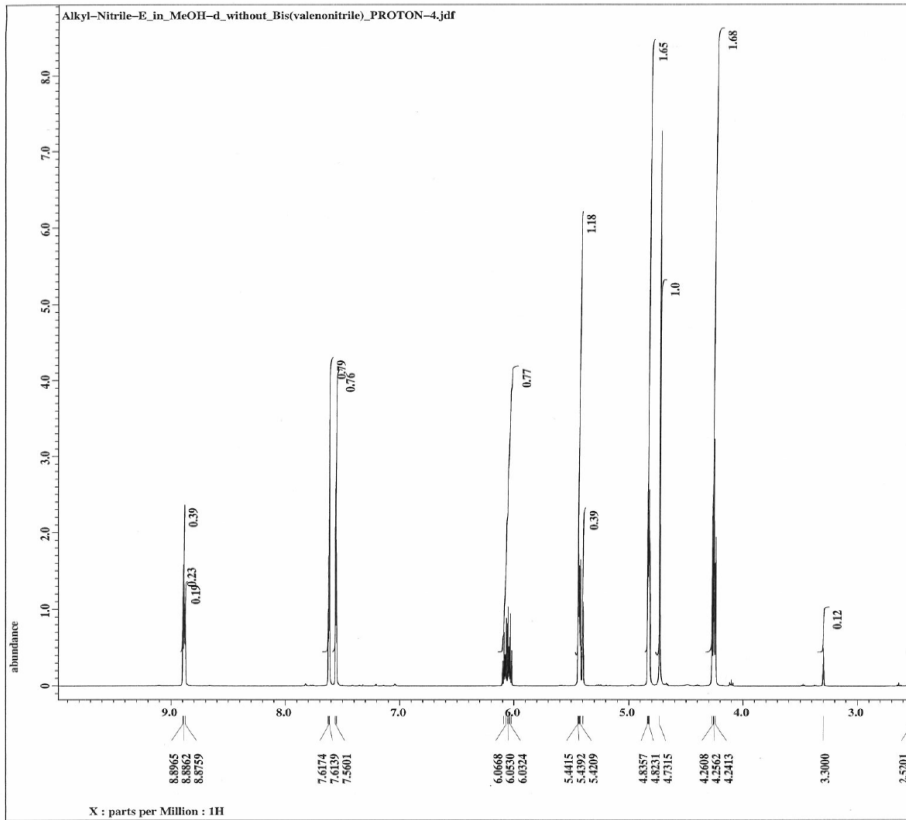

2

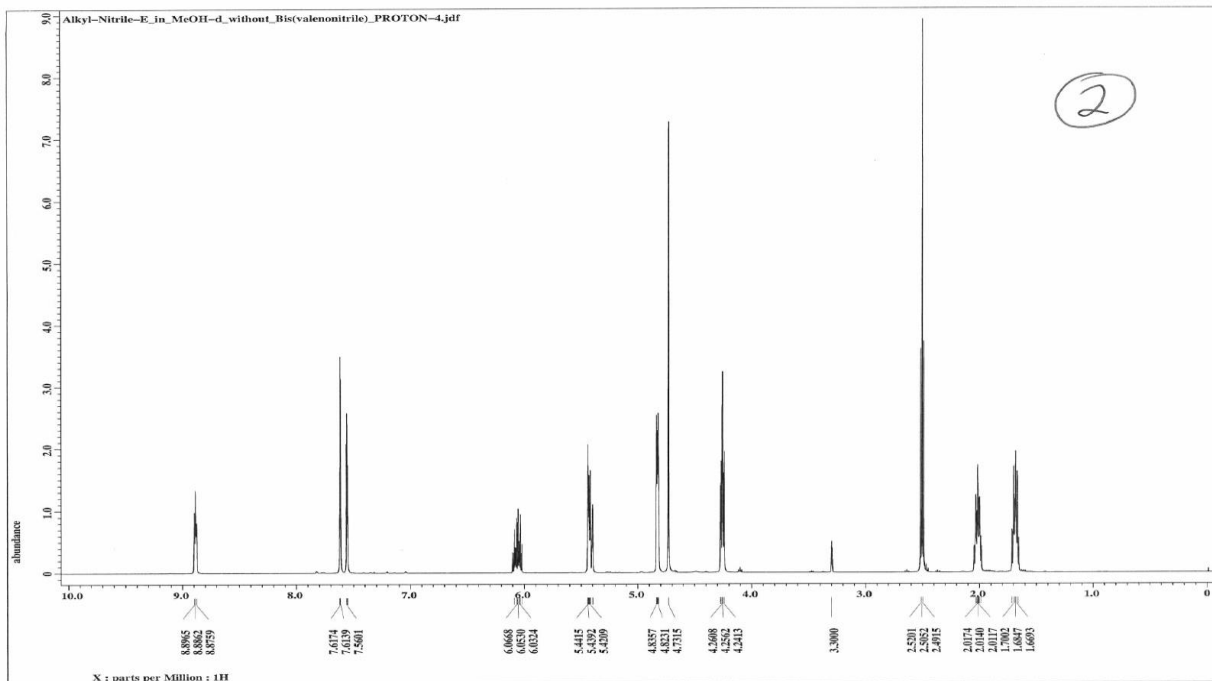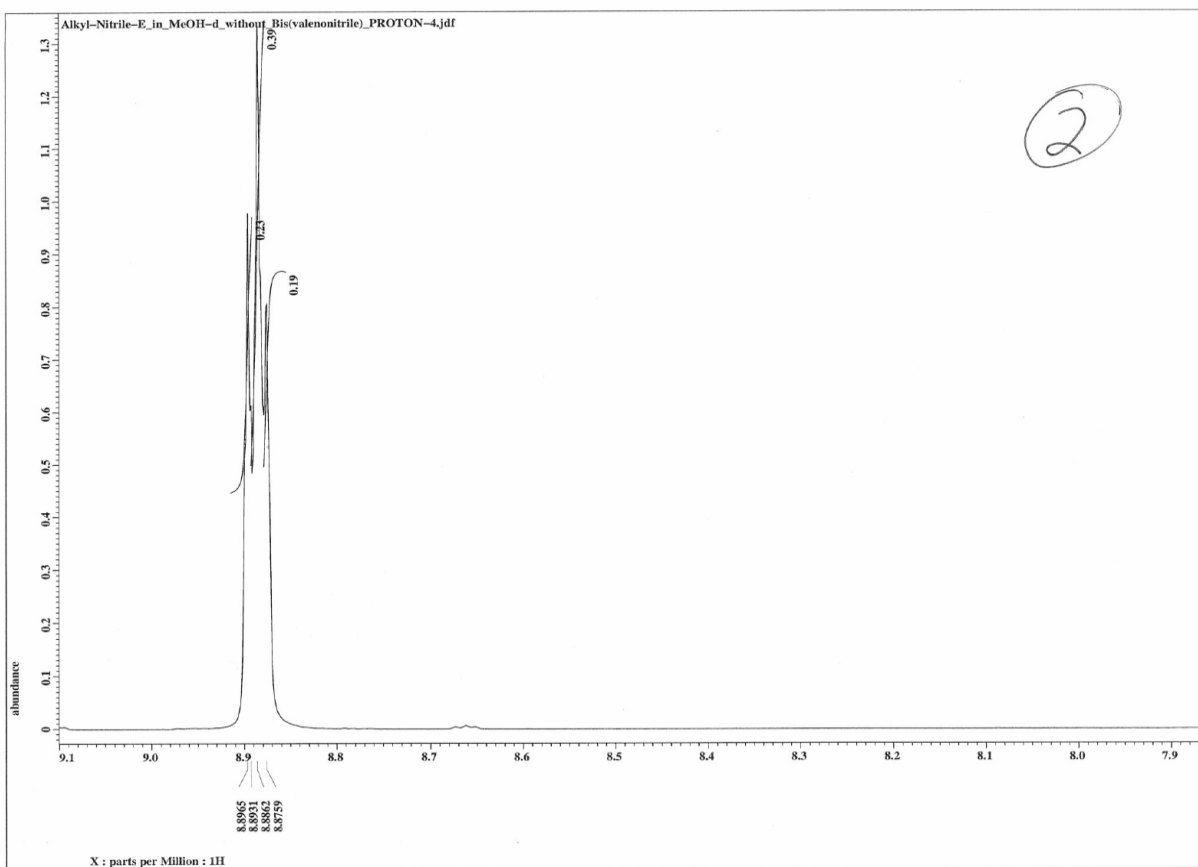

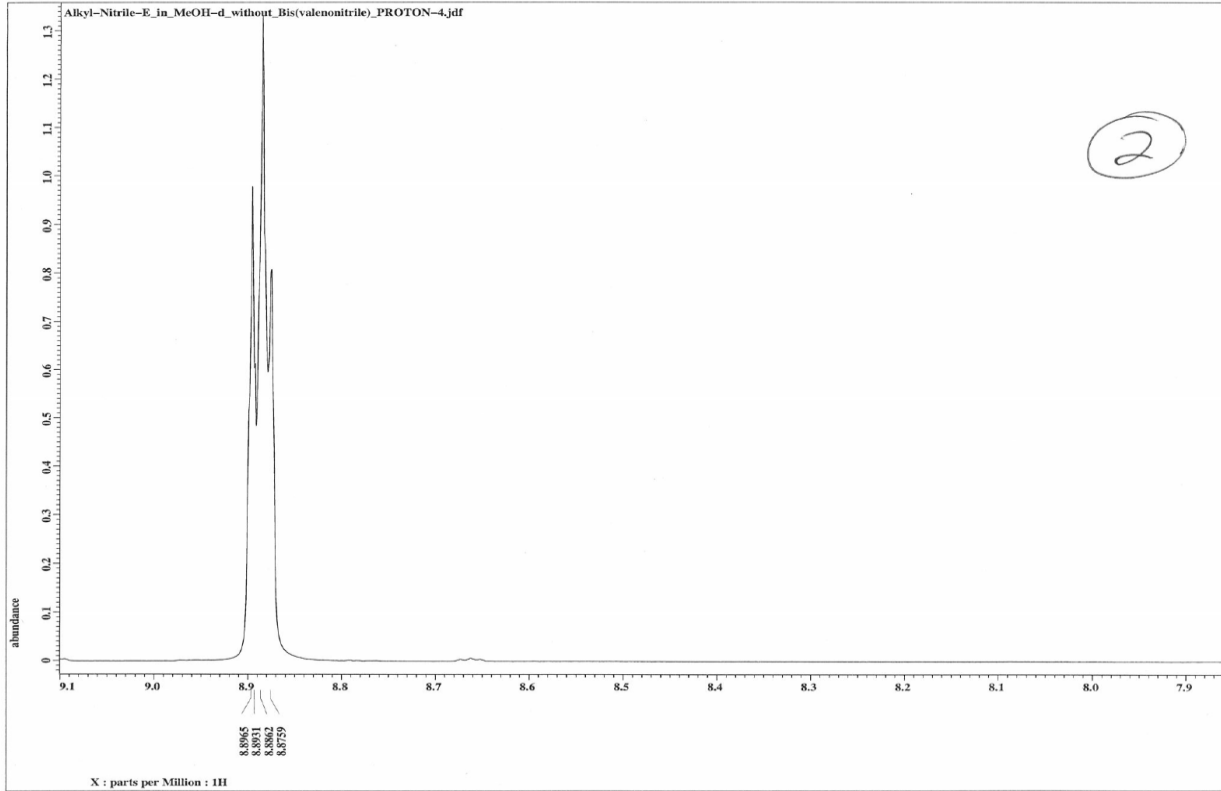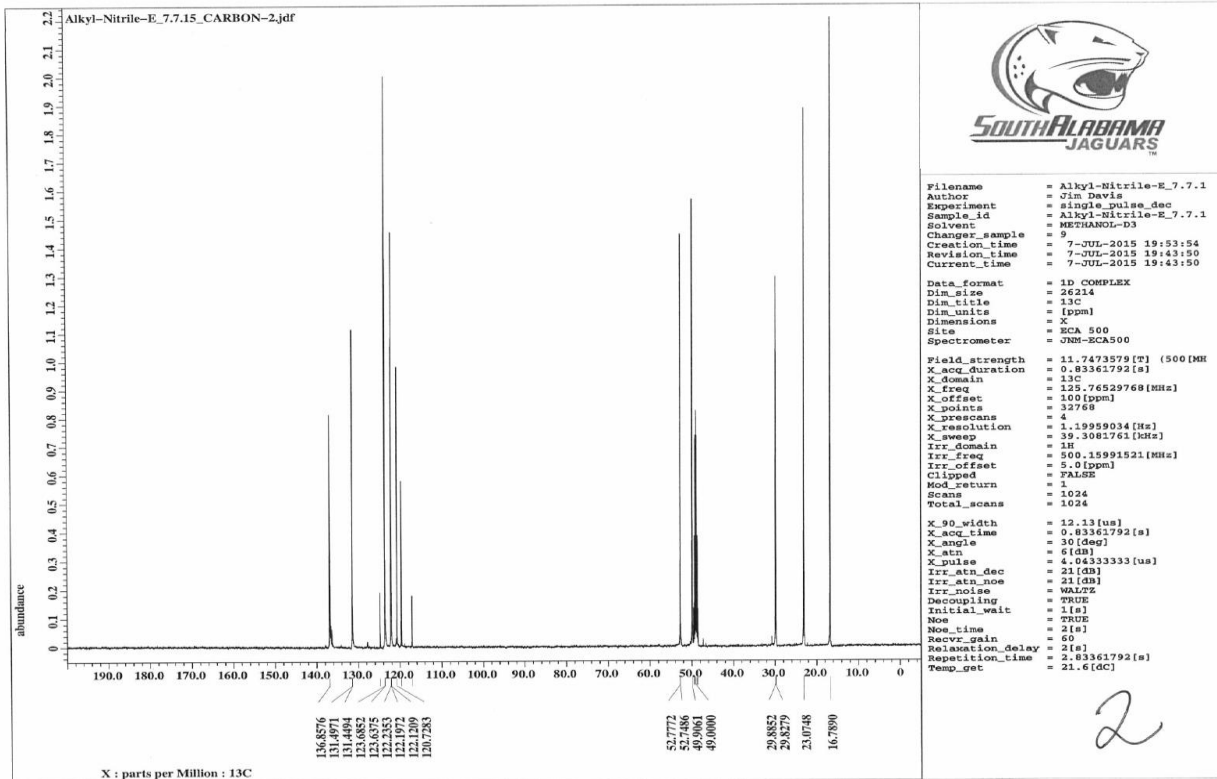

2

# Nitrile-Alkyl

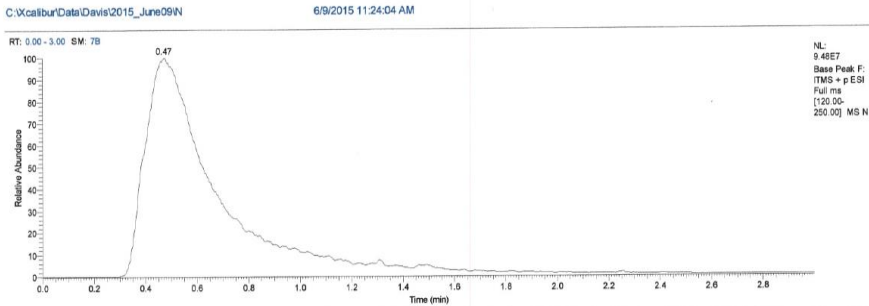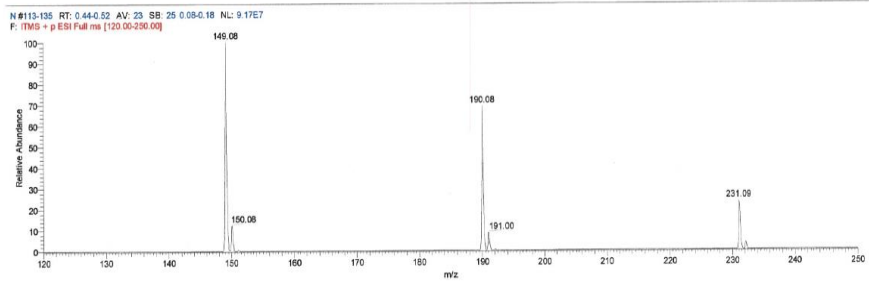

## Atlantic Microlab, Inc.

No. JD Allyl Valeronitrile Batch A

Atlantic Blvd. Suite M  
Atlanta, GA 30071  
atlanticmicrolab.com

Company/School U of So Alabama  
 Dept. Chem  
 Address \_\_\_\_\_  
 City, State, Zip \_\_\_\_\_  
 Name James J Davis Date 6/4/15  
 Phone \_\_\_\_\_

Analyst/Supervisor: Davis  
C# \_\_\_\_\_

| Element | Theory | Found | Single <input type="checkbox"/>                                                                                                                                                                                                                                                                                                                                                                                                                                                                                         | Duplicate <input type="checkbox"/> |
|---------|--------|-------|-------------------------------------------------------------------------------------------------------------------------------------------------------------------------------------------------------------------------------------------------------------------------------------------------------------------------------------------------------------------------------------------------------------------------------------------------------------------------------------------------------------------------|------------------------------------|
| C       | 33.19  | 33.22 |                                                                                                                                                                                                                                                                                                                                                                                                                                                                                                                         |                                    |
| H       | 3.43   | 3.48  |                                                                                                                                                                                                                                                                                                                                                                                                                                                                                                                         |                                    |
| N       | 11.91  | 11.95 |                                                                                                                                                                                                                                                                                                                                                                                                                                                                                                                         |                                    |
|         |        |       | Elements Present: Analyze for: <u>CHN</u><br>Hygroscopic <input type="checkbox"/> Explosive <input type="checkbox"/><br>M.P. _____ B.P. _____<br>To be dried: Yes <input checked="" type="checkbox"/> No <input type="checkbox"/><br>Temp. <u>60</u> Vac. <u>High</u> Time <u>24</u><br>Rush Service <input checked="" type="checkbox"/> Rush service guarantees analyses will be completed and results available by 5 PM EST on the day the sample is received by 11 AM.<br>Include Email Address or FAX # Below _____ |                                    |

2

Received JUN 08 2015 Date Completed JUN 08 2015  
Initials: \_\_\_\_\_

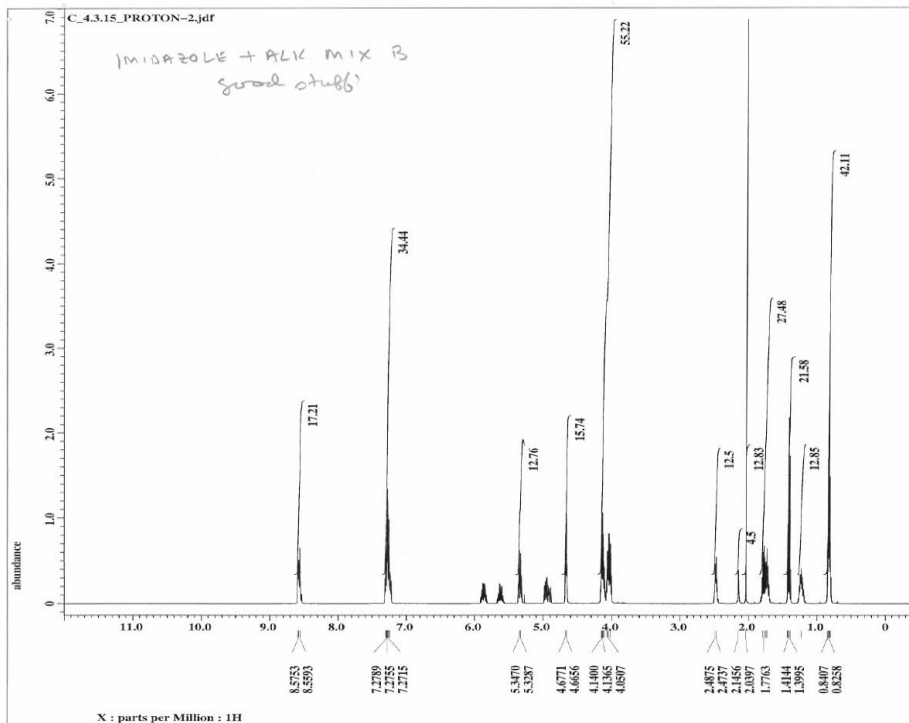


```

Filename      = C.4.3.15_PROTON-2.jdr
Author       = Jim Davis
Experiment   = single_pulse.ex2
Sample_id    = C.4.3.15
Solvent      = CHLOROFORM-D
Change_sample = 14
Creation_time = 3-APR-2015 15:04:50
Revision_time = 3-APR-2015 15:53:36
Current_time = 3-APR-2015 15:53:36

Data_format  = 1D COMPLEX
Dim_size     = 13107
Dim_scale    = 18
Dim_units    = [ppm]
Dimensions   = K
Site         = ECA 500
Spectrometer = JNM-ECA500

Field_strength = 11.7473579 [T] (500 [MH]
X_acq_duration = 1.74587904 [s]
X_domain       = 18
X_freq         = 500.15991521 [MHz]
X_offset       = 5.0 [ppm]
X_points       = 16384
X_prescans     = 1
X_resolution   = 0.57277737 [Hz]
X_sweep        = 9.38438438 [Hz]
F1_domain      = 18
F1_freq        = 500.15991521 [MHz]
F1_offset      = 5.0 [ppm]
F1_domain      = 18
F1_freq        = 500.15991521 [MHz]
F1_offset      = 5.0 [ppm]
Mod_return     = clipped
Mod_return     = 1
Scans          = 16
Total_scans    = 16

X_90_width    = 14.59 [us]
X_acq_time     = 1.74587904 [s]
X_angle        = 45 [deg]
X_atn          = 5 [dB]
X_pulse        = 7.29 [us]
F1_mode        = OFF
F1_mode        = OFF
Dante_present  = FALSE
Initial_wait   = 1 [s]
Recvz_gain     = 18
Relaxation_delay = 4 [s]
Repetition_time = 1.74587904 [s]
Temp_get       = 22.4 [C]
  
```

3

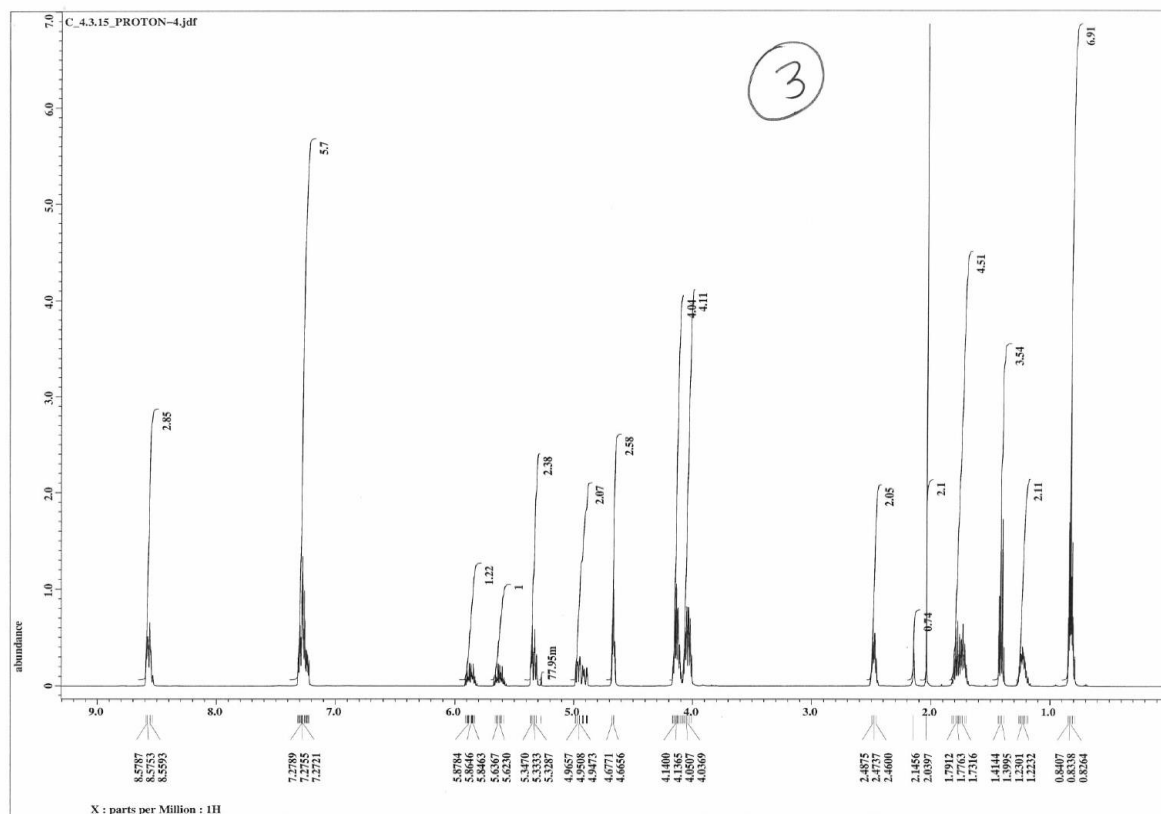



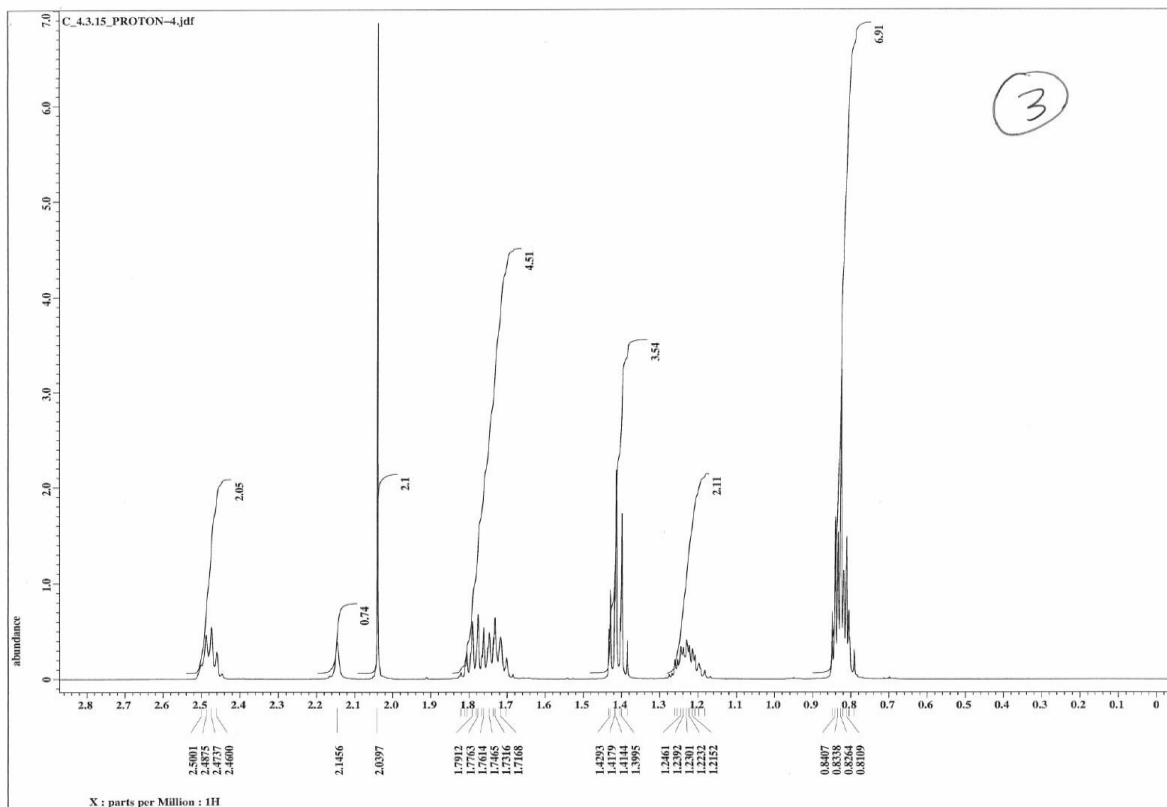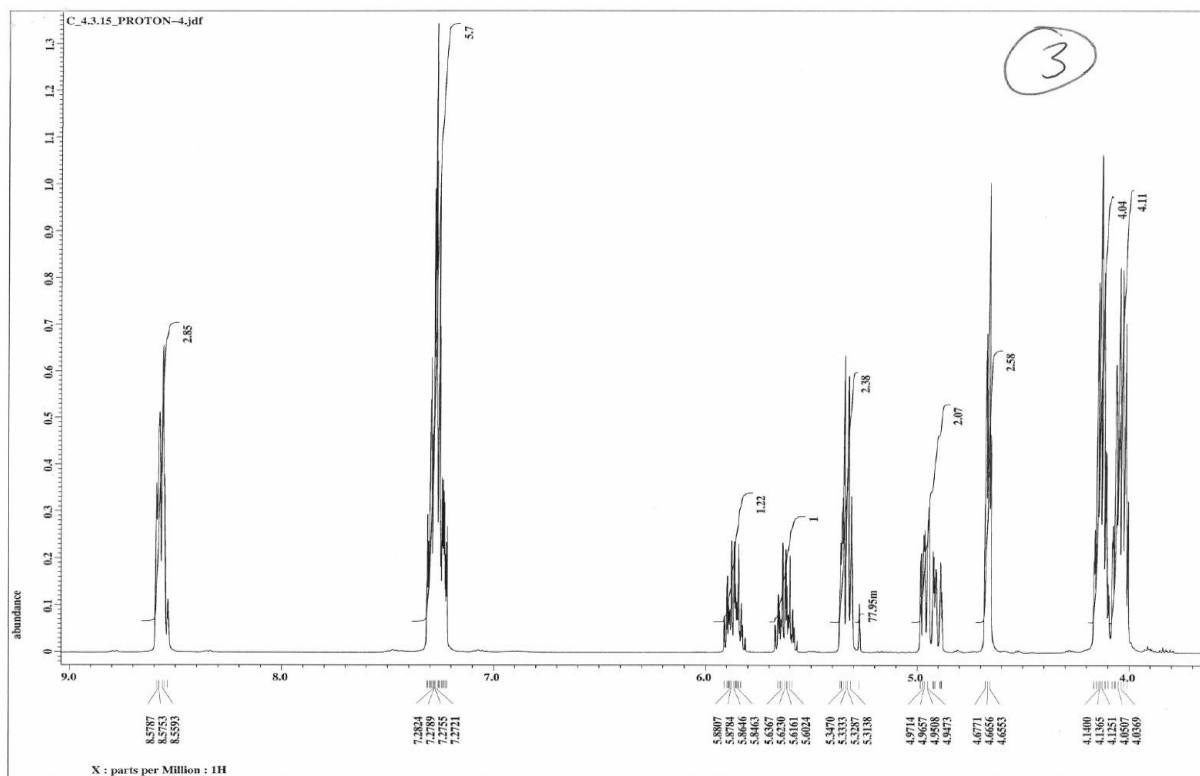

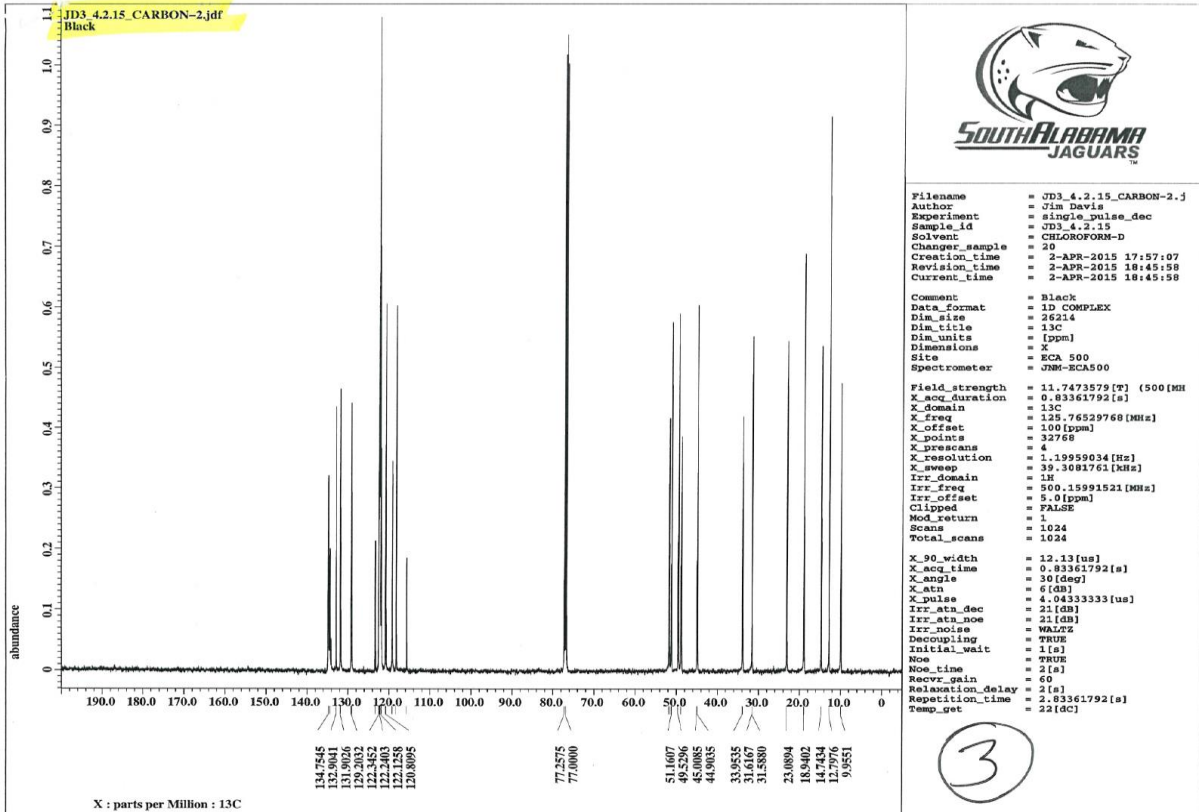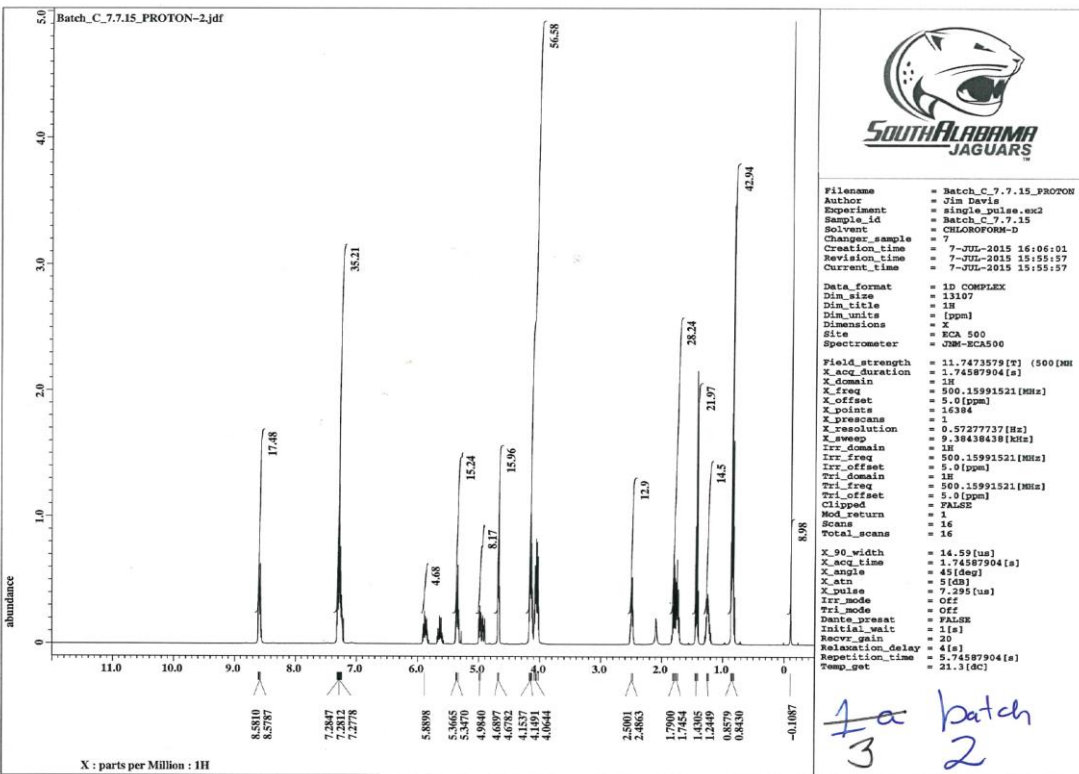

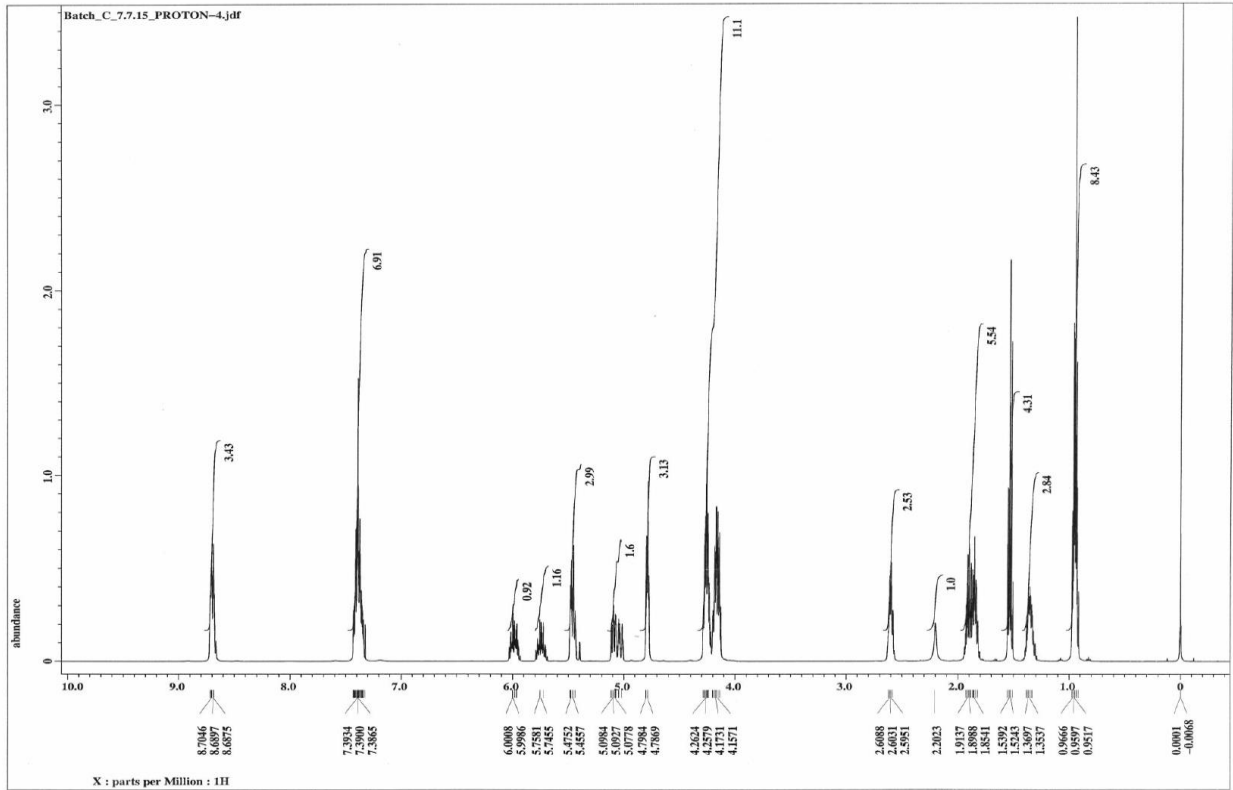

1a batch 2

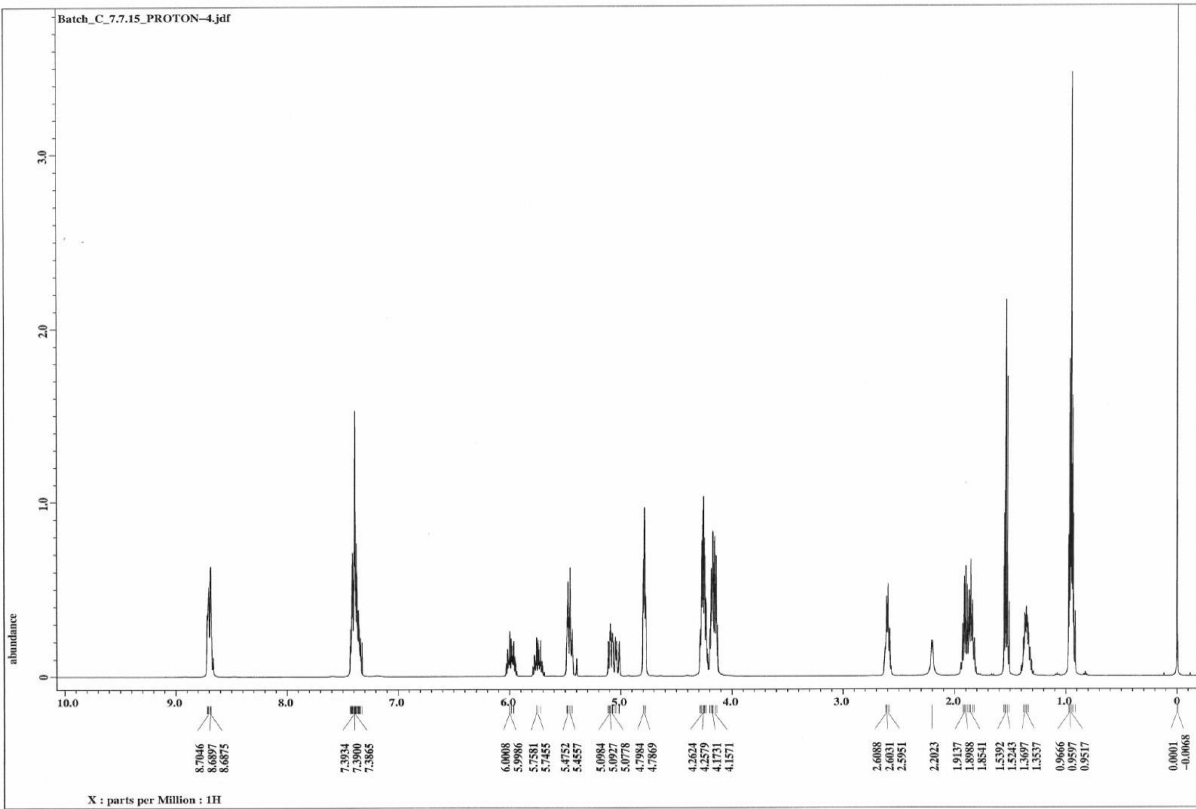

1a batch 2

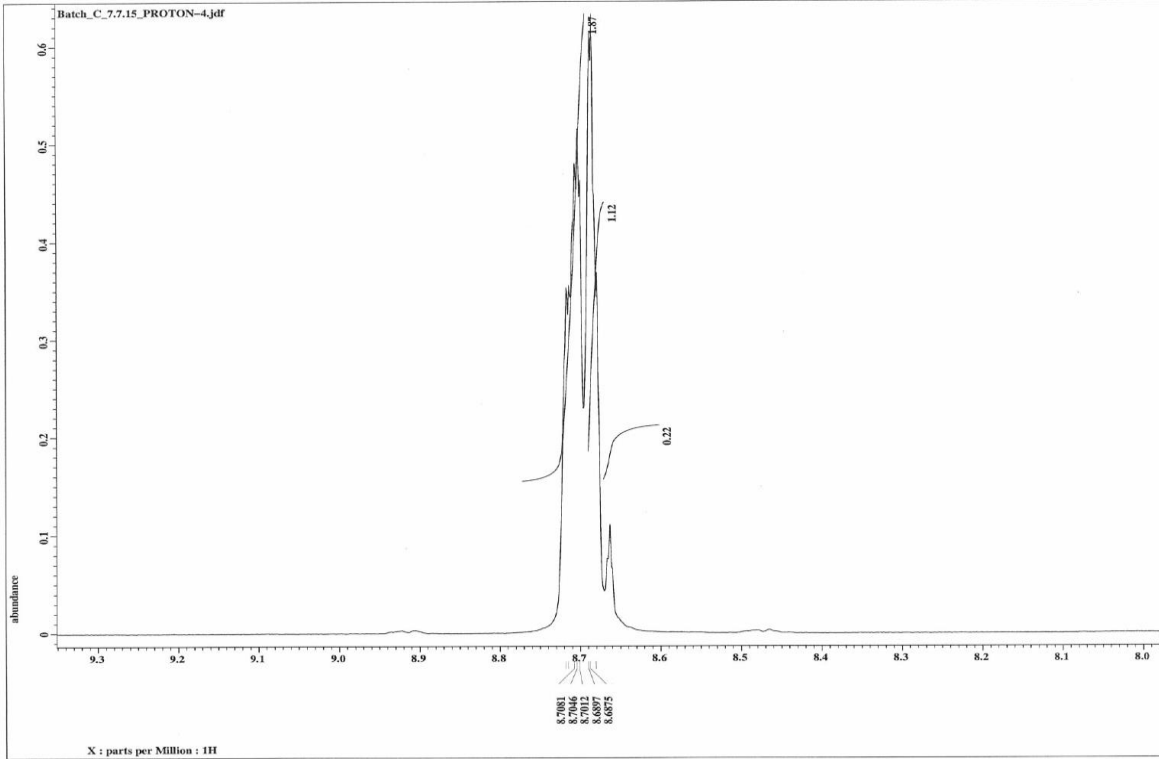

1a batch 2

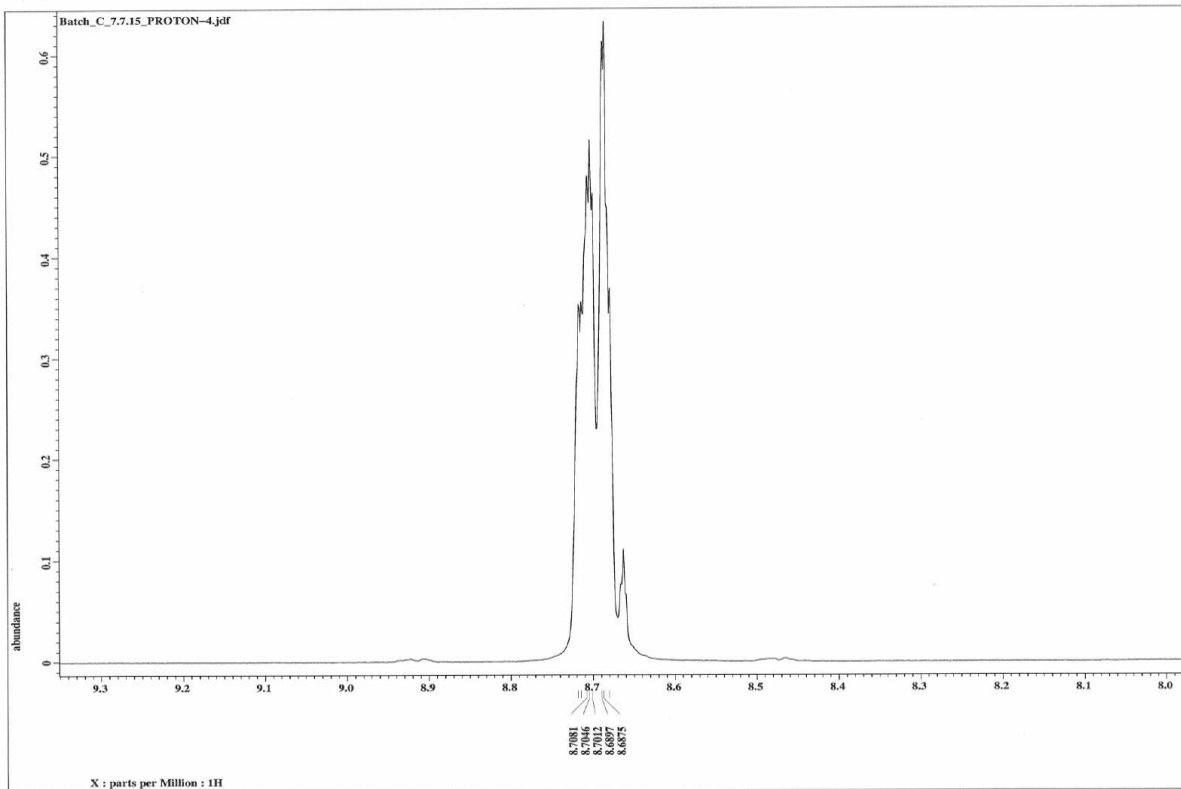

1a batch 2

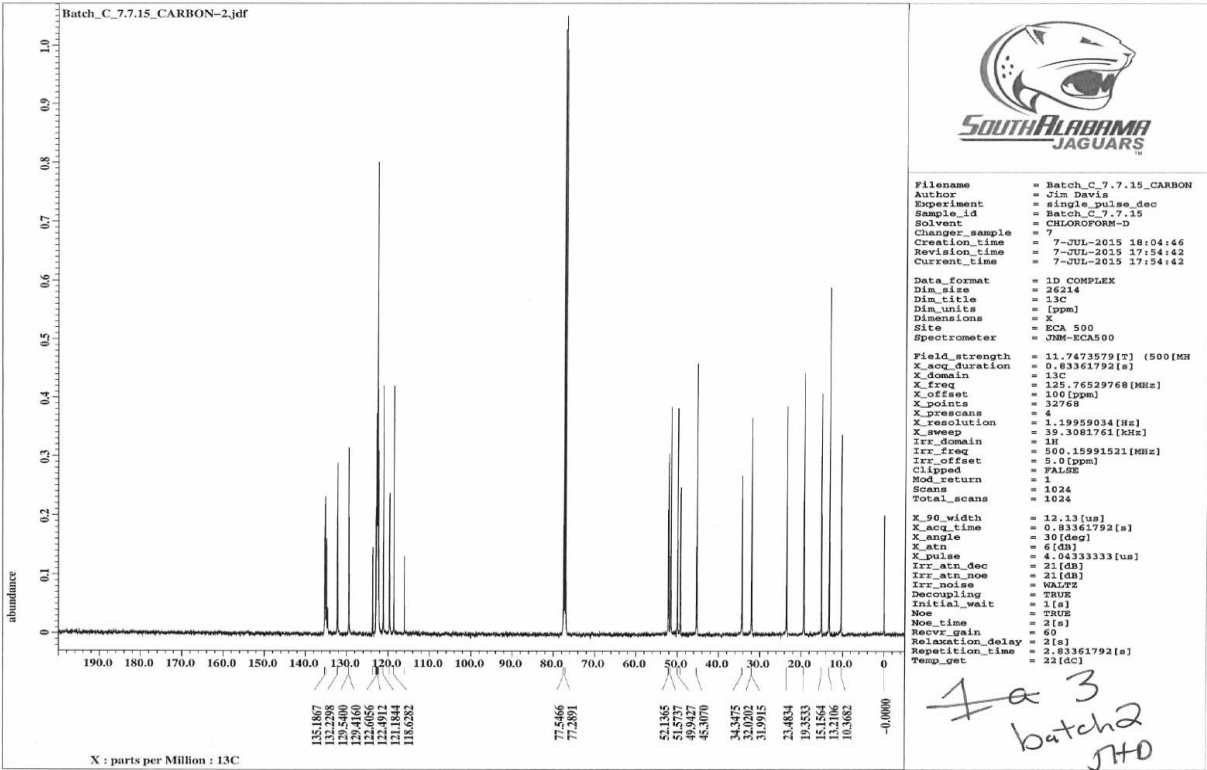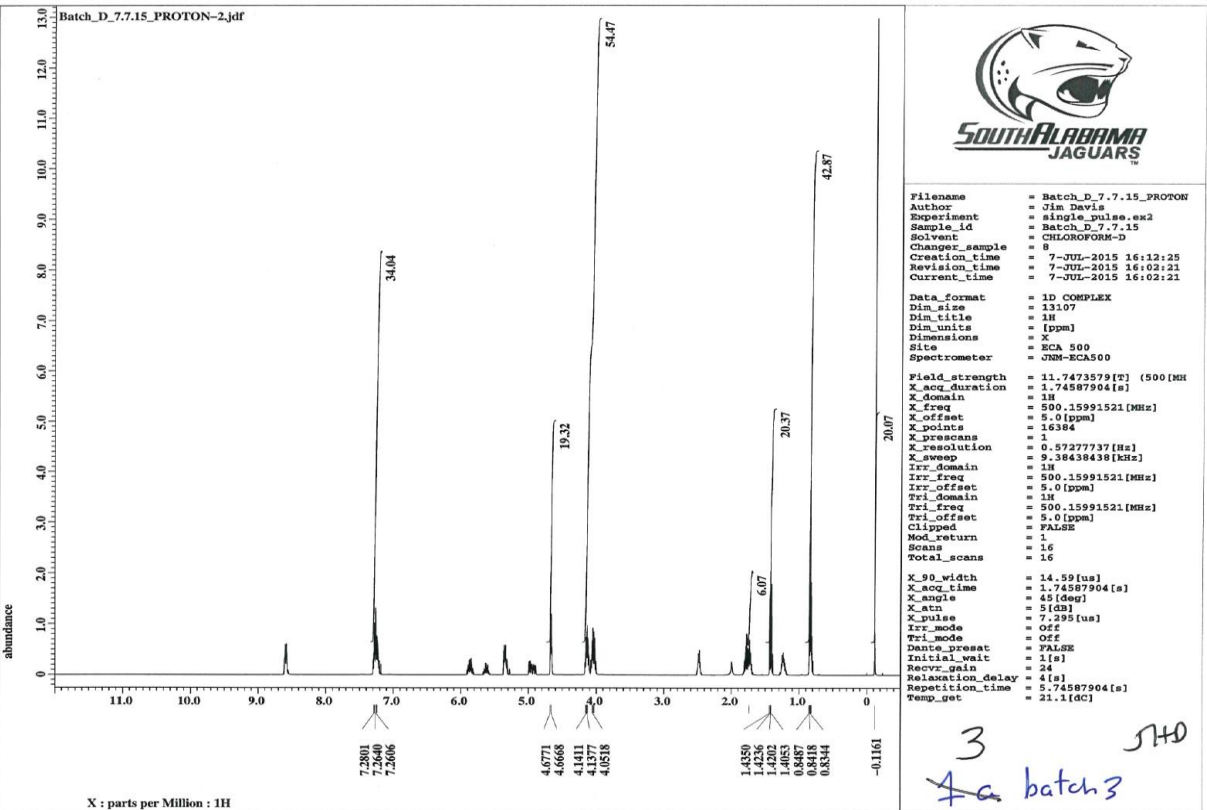

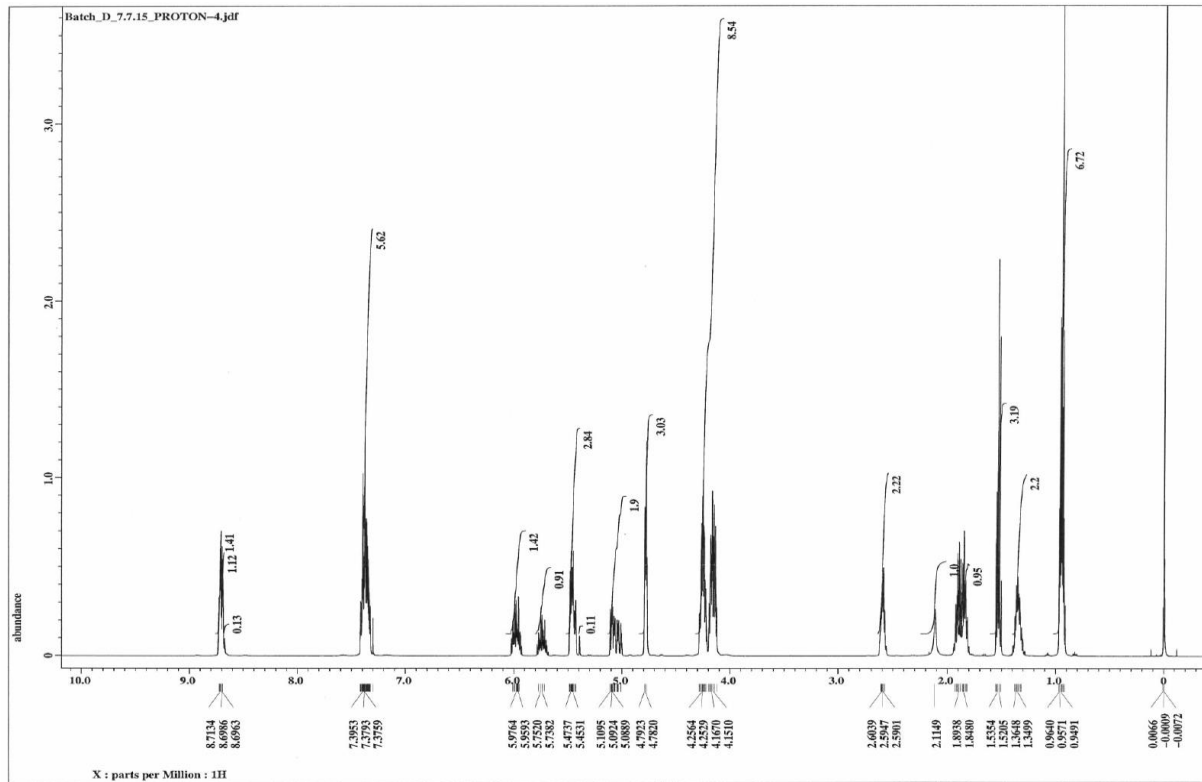

1 a batch 3

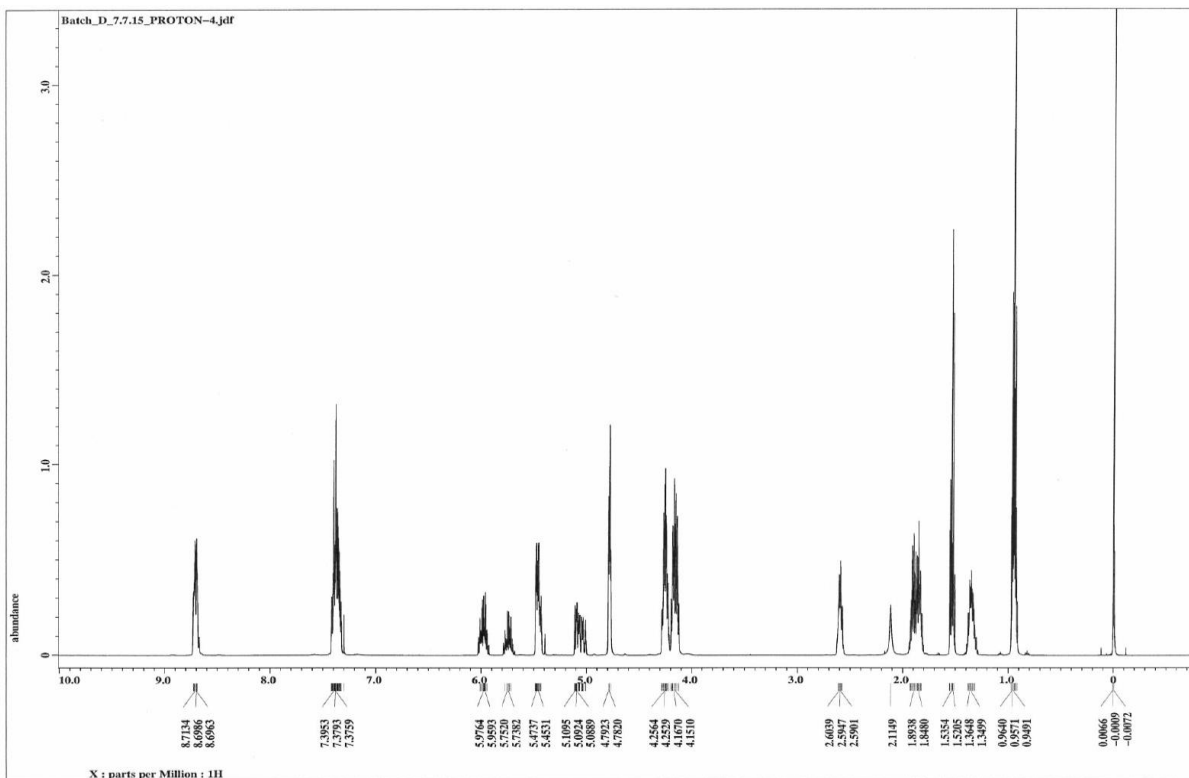

1 a batch 3

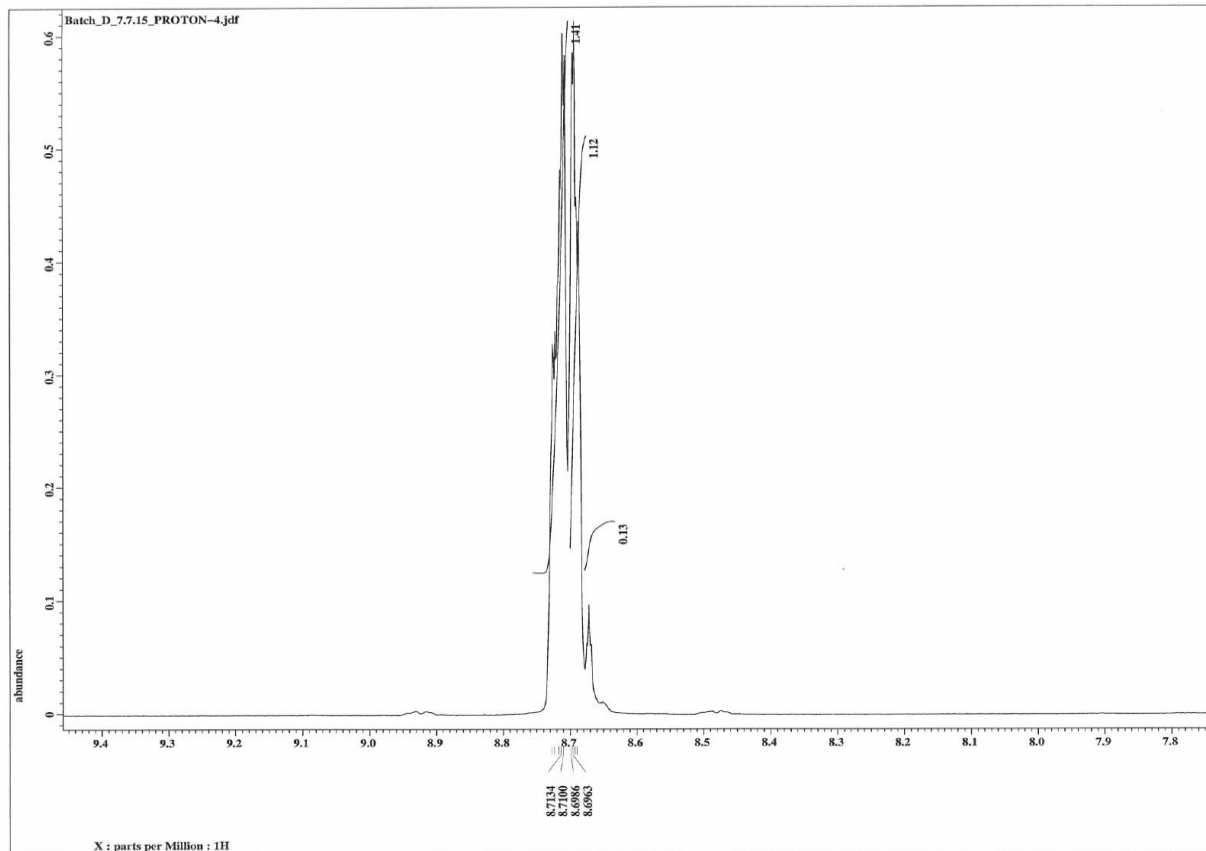

*1 a beta?*

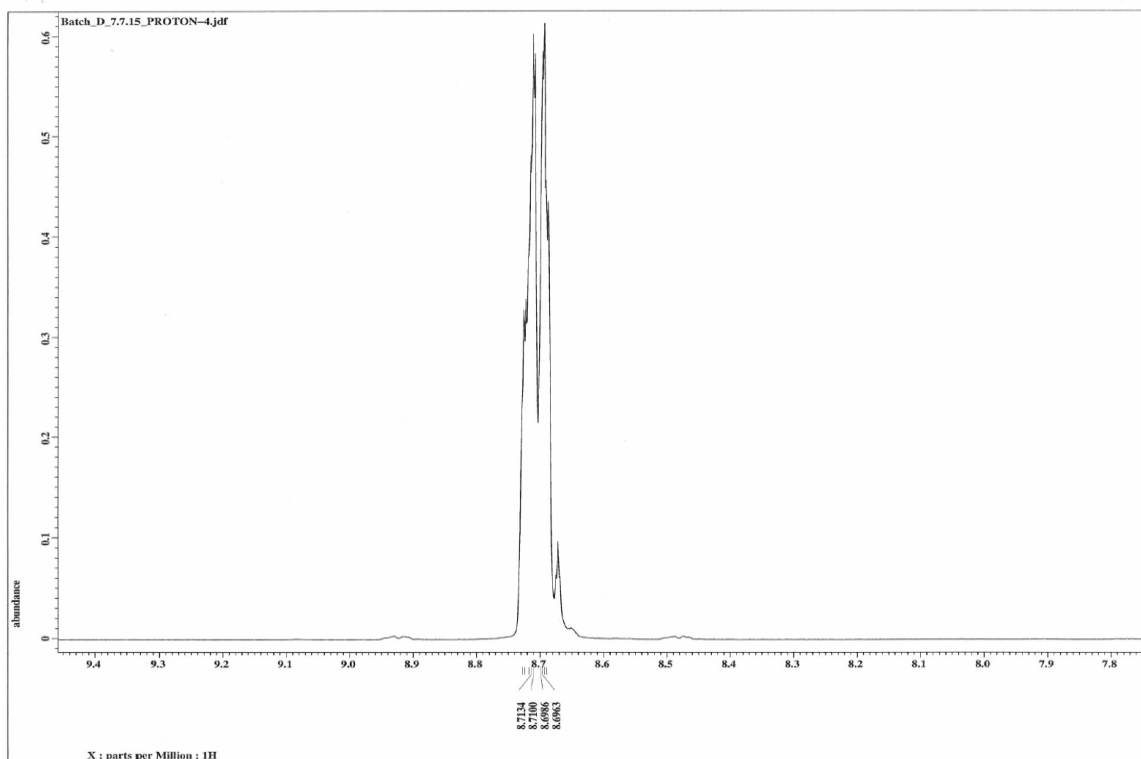

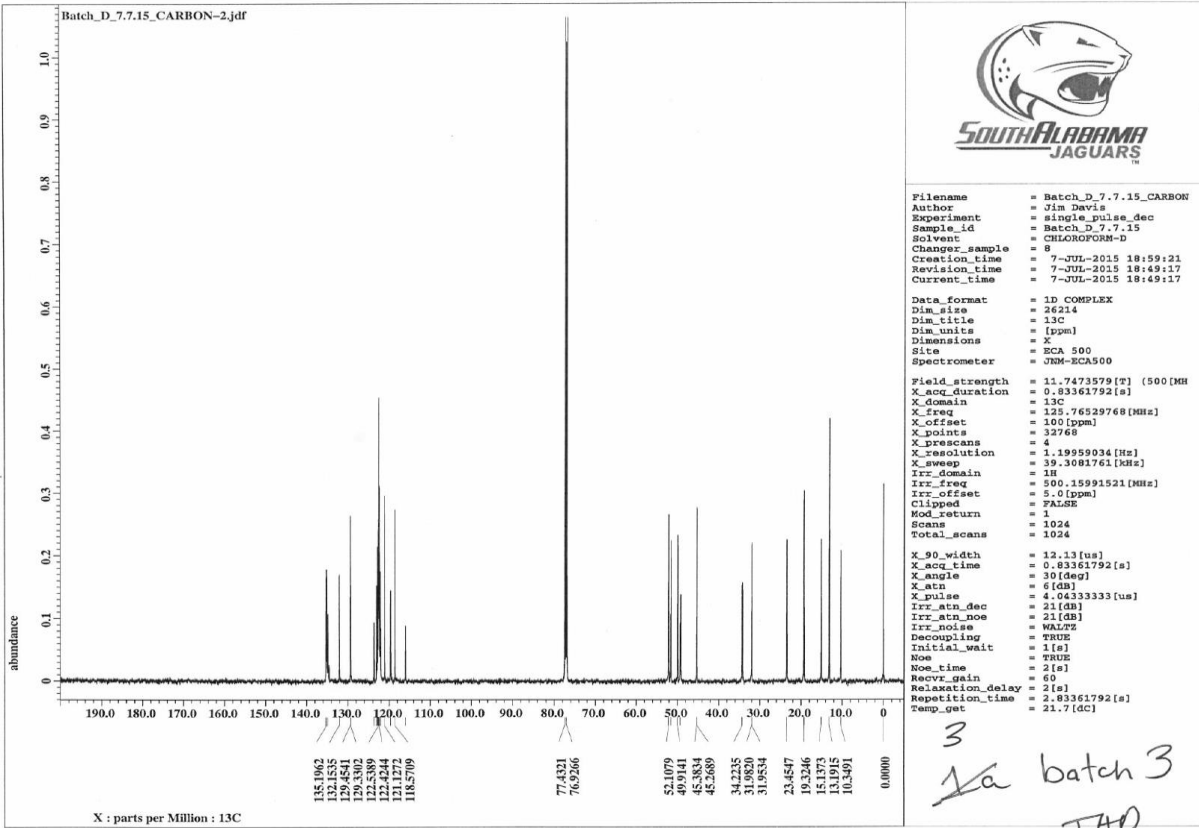

## Three Batches Stacked

3

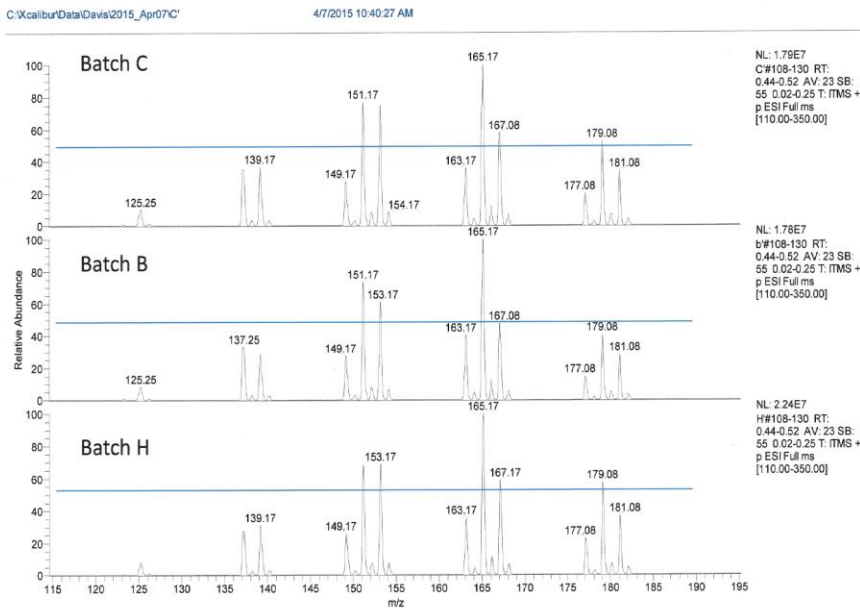

NOTE: Three sets of two ions each have redundant masses:  $m/z = 151, 153, 165$ .



## Atlantic Microlab, Inc.

No. JHD - ALKYL B - H

Atlantic Blvd. Suite M  
 Mobile, GA 30071  
 atlanticmicrolab.com

Company/School Univ. South Alabama

Dept. Chemistry

Address CHEM Bldg Room 223, USA Campus

City, State, Zip Mobile, AL, 36688

Analyst/Supervisor: Davis

Name James Davis

Date 04/08/2015

Lab# PO Z147846

Phone (251) 751-0520

| Element                                                                                                                                                                                                                                                                                                                                                                                                                                                                                                                                                                                                               | Theory | Found | Single <input checked="" type="checkbox"/> | Duplicate <input type="checkbox"/> |
|-----------------------------------------------------------------------------------------------------------------------------------------------------------------------------------------------------------------------------------------------------------------------------------------------------------------------------------------------------------------------------------------------------------------------------------------------------------------------------------------------------------------------------------------------------------------------------------------------------------------------|--------|-------|--------------------------------------------|------------------------------------|
| C                                                                                                                                                                                                                                                                                                                                                                                                                                                                                                                                                                                                                     | 31.31  | 31.39 | $\Delta < .4\%$                            |                                    |
| H                                                                                                                                                                                                                                                                                                                                                                                                                                                                                                                                                                                                                     | 3.73   | 3.67  | $\Delta < .4\%$                            |                                    |
| N                                                                                                                                                                                                                                                                                                                                                                                                                                                                                                                                                                                                                     | 9.61   | 9.63  | $\Delta < .4\%$                            |                                    |
| Elements C, H, N, F, S, O<br>Present: Analyze for: <u>CHN</u><br>Hygroscopic <input type="checkbox"/> Explosive <input type="checkbox"/><br>M.P. <u>liquid</u> - NO VAPOR PRESS. B.P. _____<br>To be dried: Yes <input checked="" type="checkbox"/> No <input type="checkbox"/><br>Temp. <u>60C</u> Vac. <u>high</u> Time <u>1 hour</u><br>Rush Service <input checked="" type="checkbox"/> <small>Rush service guarantees analyses will be completed and results available by 5 PM EST on the day the sample is received by 11 AM.</small><br>Include Email Address or FAX # Below<br><u>jdavis@southalabama.edu</u> |        |       |                                            |                                    |

Received APR 09 2015

Date Completed APR 09 2015

Remarks:

*# IL-3, 3x batches*

## Atlantic Microlab, Inc.

No. JHD - ALKYL B - C

Atlantic Blvd. Suite M  
 Mobile, GA 30071  
 atlanticmicrolab.com

Company/School Univ. South Alabama

Dept. Chemistry

Address CHEM Bldg Room 223, USA Campus

City, State, Zip Mobile, AL, 36688

Analyst/Supervisor: Davis

Name James Davis

Date 04/08/2015

Lab# PO Z147846

Phone (251) 751-0520

| Element                                                                                                                                                                                                                                                                                                                                                                                                                                                                                                                                                                                                               | Theory | Found | Single <input checked="" type="checkbox"/> | Duplicate <input type="checkbox"/> |
|-----------------------------------------------------------------------------------------------------------------------------------------------------------------------------------------------------------------------------------------------------------------------------------------------------------------------------------------------------------------------------------------------------------------------------------------------------------------------------------------------------------------------------------------------------------------------------------------------------------------------|--------|-------|--------------------------------------------|------------------------------------|
| C                                                                                                                                                                                                                                                                                                                                                                                                                                                                                                                                                                                                                     | 31.31  | 31.43 | $\Delta < .4\%$                            |                                    |
| H                                                                                                                                                                                                                                                                                                                                                                                                                                                                                                                                                                                                                     | 3.73   | 3.80  | $\Delta < .4\%$                            |                                    |
| N                                                                                                                                                                                                                                                                                                                                                                                                                                                                                                                                                                                                                     | 9.61   | 9.73  | $\Delta < .4\%$                            |                                    |
| Elements C, H, N, F, S, O<br>Present: Analyze for: <u>CHN</u><br>Hygroscopic <input type="checkbox"/> Explosive <input type="checkbox"/><br>M.P. <u>liquid</u> - NO VAPOR PRESS. B.P. _____<br>To be dried: Yes <input checked="" type="checkbox"/> No <input type="checkbox"/><br>Temp. <u>60C</u> Vac. <u>high</u> Time <u>1 hour</u><br>Rush Service <input checked="" type="checkbox"/> <small>Rush service guarantees analyses will be completed and results available by 5 PM EST on the day the sample is received by 11 AM.</small><br>Include Email Address or FAX # Below<br><u>jdavis@southalabama.edu</u> |        |       |                                            |                                    |

Received APR 09 2015

Date Completed APR 09 2015

Remarks:

# Atlantic Microlab, Inc.

No. JHD - ALKYL B - B

Atlantic Blvd. Suite M  
 Mobile, GA 30071  
 atlanticmicrolab.com

Company/School Univ. South Alabama  
 Dept. Chemistry  
 Address CHEM Bldg Room 223, USA Campus  
 City, State, Zip Mobile, AL, 36688

Analyst/Supervisor: Davis Name James Davis Date 04/08/2015  
 C# PO Z147846 Phone (251) 751-0520

| Element | Theory | Found | Single <input checked="" type="checkbox"/> | Duplicate <input type="checkbox"/> |
|---------|--------|-------|--------------------------------------------|------------------------------------|
| C       | 31.31  | 31.37 | $\Delta < .4\%$                            |                                    |
| H       | 3.73   | 3.81  | $\Delta < .4\%$                            |                                    |
| N       | 9.61   | 9.74  | $\Delta < .4\%$                            |                                    |
|         |        |       |                                            |                                    |
|         |        |       |                                            |                                    |
|         |        |       |                                            |                                    |

Elements C, H, N, F, S, O  
 Present: \_\_\_\_\_  
 Analyze CHN  
 for: \_\_\_\_\_  
 Hygroscopic  Explosive   
 M.P. liquid - NO VAPOR PRESS B.P. \_\_\_\_\_  
 To be dried: Yes  No   
 Temp. 80C Vac. High Time 1 hour  
 Rush Service  Rush service guarantees analyses will be completed and results available by 5 PM EST on the day the sample is received by 11 AM.  
 Include Email Address or FAX # Below  
jdavis@southalabama.edu

Received APR 09 2015 Date Completed APR 09 2015  
 Notes: \_\_\_\_\_

## DSC Data and Acquisition

Thermal analysis was performed via differential scanning calorimetry. Data was collected on a TA Instruments Q2000. The samples were run in open pans, heated to 110°C at 10°C/min and held there for 10 minutes to degas and remove residual trace solvent. Next, they were cooled at 10°C/min to -85°C and held for 5 minutes. Data was then collected as the samples were heated at 10°C/min to 200°C.

The results are shown in Figure 2 (main text) for **1a** (solid), **2** (long dash) and **3** (short dash). Interestingly, no distinct solid/liquid phase transitions are observed, although a low temperature glass transition is indicated for **2**. The small thermal event at ~100°C for all samples, and is likely the loss of trace water. Samples were also run at scan rates of 1°C/min with similar thermal behavior (see Supplementary Information).

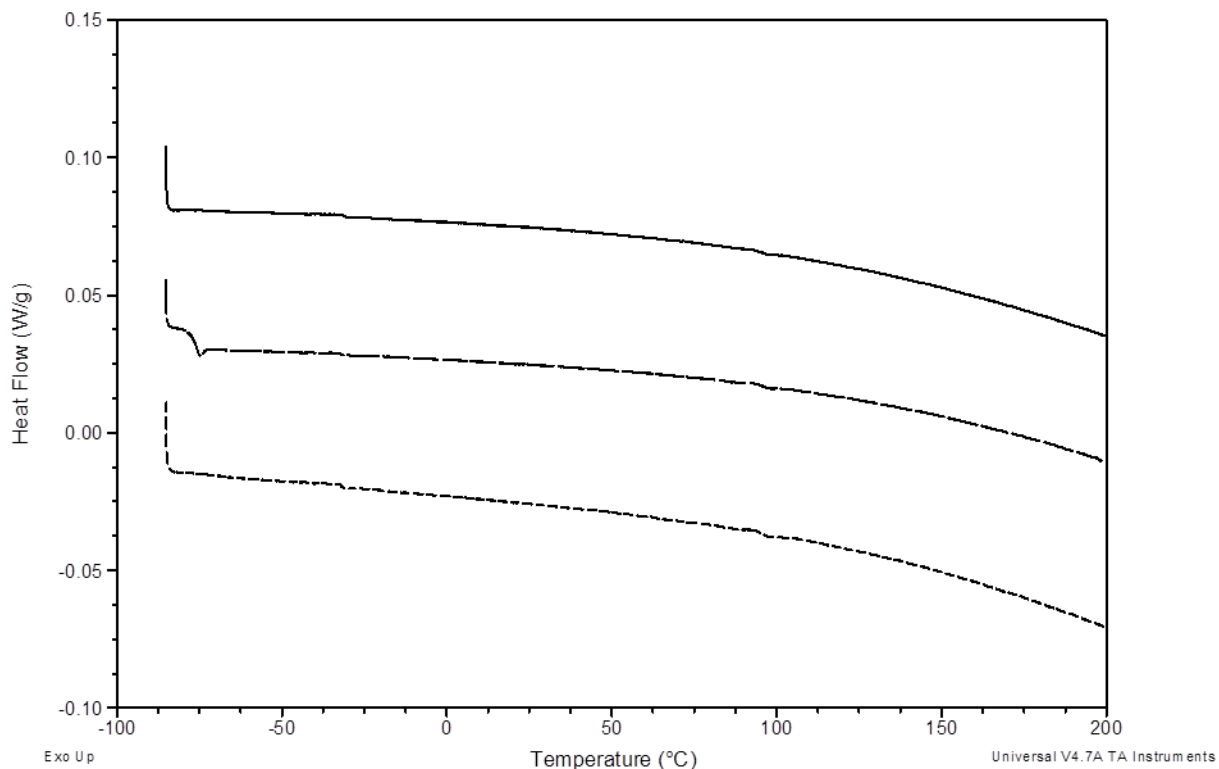

**Figure SI-1.** DSC traces compounds **1a** (solid), **2** (long dash) and **3** (short dash). The scan procedure is identical to that in the main body of the article, except that the data collection scan was run at 1°C/min. Like the scans obtained at 10°C/min, these results indicate no phase transitions discernable through thermal events for **1a** and **3**, with a low temperature glass transition observed for **2**. The thermal event at around 100°C is seen here as well, although diminished in relative magnitude. The y axis values have been offset, but not rescaled.

## Water Determination (Karl Fisher)

Water contents for **1a-3** were not part of our original characterization panel, and were only acquired after a request by reviewers of the present manuscript (with which we were happy to comply). However, note that by the time the measurements were made the samples had been exposed to quite humid air for ca. 3 mos. and were not re-dried before doing the Karl Fisher experiments. Consequently, the values below probably represent water saturation values for the new ILs.

| Sample | wt (g)  | Water content (ppm) |           |                   |
|--------|---------|---------------------|-----------|-------------------|
| 1a     | trial 1 | 0.9775              | 1858.4277 | average      Stdv |

|    |         |        |           |             |             |
|----|---------|--------|-----------|-------------|-------------|
|    | trial 2 | 1.135  | 1867.31   | 1859.849233 | 6.861345915 |
|    | trial 3 | 0.9166 | 1853.81   |             |             |
| 1b | trial 1 | 0.7045 | 2526.448  |             |             |
|    | trial 2 | 0.7217 | 2401.102  | 2471.261    | 64.00019935 |
|    | trial 3 | 0.8665 | 2486.233  |             |             |
| 1c | trial 1 | 0.6456 | 2479.905  |             |             |
|    | trial 2 | 0.6676 | 2536.87   | 2512.004333 | 29.1632861  |
|    | trial 3 | 0.722  | 2519.238  |             |             |
| 2  | trial 1 | 0.5207 | 1389.8599 |             |             |
|    | trial 2 | 0.6705 | 1333.4236 | 1332.686833 | 57.5449875  |
|    | trial 3 | 0.7176 | 1274.777  |             |             |
| 3  | trial 1 | 0.71   | 4063.4135 |             |             |
|    | trial 2 | 0.6975 | 4066.791  | 4057.247267 | 13.70963771 |
|    | trial 3 | 0.7513 | 4041.5373 |             |             |
